# Supplementary material for: Calix[4]pyrroles bearing proximally meso–meso linking straps: synthesis and anion binding properties
Source: Royal Society of Chemistry journal article supplement (doi:10.1039/c2cc33537a), 2012-01-01
Supplement: c2cc33537a.pdf [file c2cc33537a.pdf]

## Supplementary Information

# Proximally *meso-meso* Linked Calix[4]pyrroles: Synthesis and Anion Binding Properties

Ja-Young Park,<sup>a</sup> Kamil Skonieczny,<sup>b</sup> Naoki Aratani,<sup>c</sup> Atsuhiko Osuka,<sup>c</sup> Daniel T. Gryko<sup>\*,b</sup> and Chang-Hee Lee<sup>\*,a</sup>

<sup>a</sup>Department of Chemistry and Institute of molecular Science & Fusion technology, Kangwon National University, Chun-Chon 200-701 Korea; E-mail: [chhlee@kangwon.ac.kr](mailto:chhlee@kangwon.ac.kr), <sup>b</sup>Institute of Organic Chemistry Polish Academy of Sciences, Kasprzaka 44/52, 01-224 Warsaw, Poland; E-mail: [danieltgryko@gmail.com](mailto:danieltgryko@gmail.com),

<sup>c</sup>Department of Chemistry, Graduate School of Science, Kyoto University, Sakyo-ku, Kyoto 606-8502, Japan; E-mail: [osuka@kuchem.kyoto-u.ac.jp](mailto:osuka@kuchem.kyoto-u.ac.jp)

|                                                                                                                          |            |
|--------------------------------------------------------------------------------------------------------------------------|------------|
| <b>Synthetic schemes and Experimental section</b> -----                                                                  | <b>S2</b>  |
| <b>Figure S1</b> 300 MHz <sup>1</sup> H NMR spectrum of compound <b>6</b> in CDCl <sub>3</sub> -----                     | <b>S4</b>  |
| <b>Figure S2</b> 300 MHz <sup>1</sup> H NMR spectrum of compound <b>6</b> in CDCl <sub>3</sub> . -----                   | <b>S5</b>  |
| <b>Figure S3</b> 300 MHz <sup>1</sup> H NMR spectrum of compound <b>1</b> in CDCl <sub>3</sub> . -----                   | <b>S6</b>  |
| <b>Figure S4</b> <sup>13</sup> C NMR spectrum of compound <b>1</b> in CDCl <sub>3</sub> . -----                          | <b>S7</b>  |
| <b>Figure S5</b> MALDI-TOF mass spectrum of compound <b>1</b> . -----                                                    | <b>S8</b>  |
| <b>Figure S6.</b> IR spectra of compound <b>1</b> (a) and <b>2</b> (b). -----                                            | <b>S9</b>  |
| <b>Figure S7.</b> UV-vis absorption spectra of compound <b>1</b> (dash) and <b>2</b> (line) in CHCl <sub>3</sub> . ----- | <b>S10</b> |
| <b>Figure S8</b> 300 MHz <sup>1</sup> H NMR spectrum of compound <b>2</b> in CDCl <sub>3</sub> . -----                   | <b>S11</b> |
| <b>Figure S9</b> <sup>13</sup> C NMR spectrum of compound <b>2</b> in CDCl <sub>3</sub> . -----                          | <b>S12</b> |
| <b>Figure S10</b> MALDI-TOF mass spectrum of compound <b>2</b> in CDCl <sub>3</sub> . -----                              | <b>S13</b> |
| <b>Figure S11</b> HETCO spectrum of compound <b>1</b> in CDCl <sub>3</sub> . -----                                       | <b>S14</b> |
| <b>Figure S12.</b> <sup>1</sup> H NMR spectral changes of receptor <b>2</b> upon addition of fluoride anion -----        | <b>S15</b> |
| <b>Figure S13.</b> <sup>1</sup> H NMR spectral changes of receptor <b>1</b> upon addition of fluoride anion -----        | <b>S15</b> |
| <b>Figure S14.</b> <sup>1</sup> H NMR spectral changes of receptor <b>2</b> upon addition of chloride anion -----        | <b>S16</b> |
| <b>Table 1.</b> Melting Points and UV-vis absorption data of compound <b>1</b> , <b>2</b> and <b>6</b> . -----           | <b>S17</b> |
| <b>Figure S15.</b> Figure S15. UV-vis absorption spectra of of compound <b>1</b> , <b>2</b> and <b>6</b> . -----         | <b>S17</b> |
| <b>Table 2</b> Thermodynamic parameters for the anion binding with <b>1</b> and <b>2</b> at 25 °C. -----                 | <b>S18</b> |
| <b>Figure S16.</b> ITC titration curves produced from the titration of <b>1</b> and <b>2</b> with chloride anion-----    | <b>S19</b> |
| <b>Figure S17.</b> ITC titration curves produced from the titration of <b>1</b> and <b>2</b> with bromide anion -----    | <b>S19</b> |
| <b>Figure S18.</b> ITC titration curves produced from the titration of <b>1</b> and <b>2</b> with iodide anion-----      | <b>S20</b> |
| <b>Figure S19.</b> ITC titration curves produced from the titration of <b>1</b> and <b>2</b> with acetate anion -----    | <b>S20</b> |
| <b>Single Crystal data</b> -----                                                                                         | <b>S21</b> |

## Synthetic schemes:

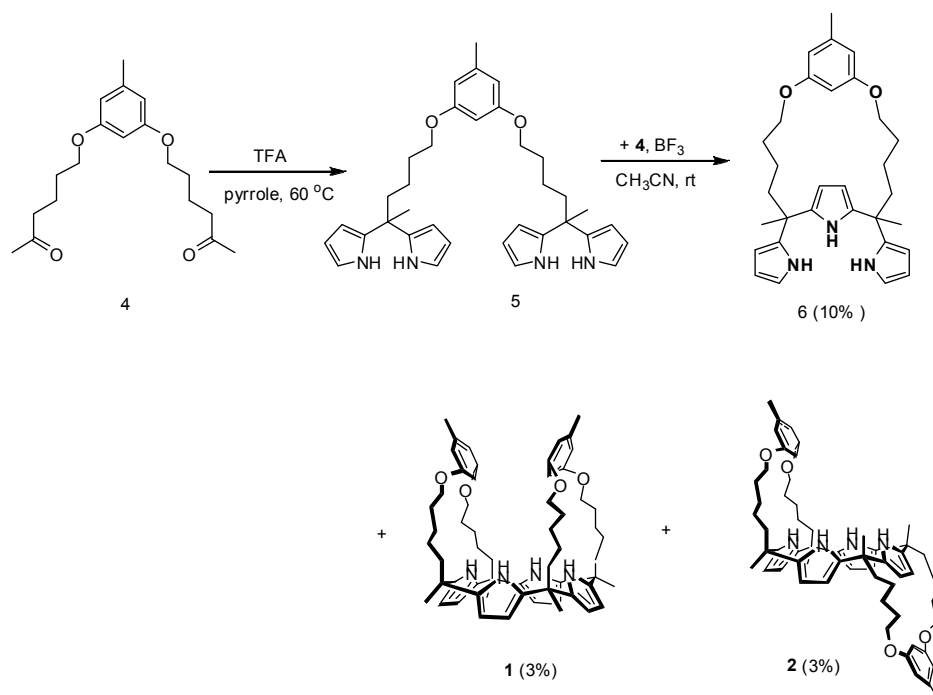

## Experimental Section

### General

<sup>1</sup>H NMR spectra were recorded on a 400 and 300 MHz Bruker NMR spectrometer using TMS as the internal standard. Chemical shifts are reported in parts per million (ppm). When peak multiplicities are given, the following abbreviations are used: s, singlet; brs, broad singlet; d, doublet; t, triplet; m, multiplet. <sup>13</sup>C NMR spectra were proton decoupled and recorded on a 100 MHz Bruker spectrometer using TMS as the internal standard. Fluorescence spectra were recorded using LS-55B (Perkin Elmer) model spectrometer. Pyrrole was distilled at atmospheric pressure from CaH<sub>2</sub>. All other chemicals and solvents were purchased from commercial sources and were used as such, unless otherwise mentioned. Column chromatography was performed over silica gel (Merck, 230-400 mesh). All titrations (UV-vis and fluorescence) were performed using HPLC grade CH<sub>3</sub>CN purchased from Aldrich. Compound **4** and **5** were synthesized using our previously reported procedure.<sup>8b</sup>

### Synthetic procedures

#### Doubly ether strapped calix[4]pyrrole (**1**) and (**2**)

To the mixture of **5** (0.5 g, 0.9 mmol) and **4** (0.5 g, 0.9 mmol) in CH<sub>3</sub>CN (150 mL) was added BF<sub>3</sub>·OEt<sub>2</sub> (0.017 mL, 0.14 mmol). The whole mixture was stirred for 12 hr at room temperature and combined with aqueous NaOH (0.1 N, 30 mL). Then, the mixture was extracted with CH<sub>2</sub>Cl<sub>2</sub> (50 mL × 3) and the organic layer was dried over anhydrous Na<sub>2</sub>SO<sub>4</sub>. Solvent was then removed in vacuo and the remaining brown solid was purified by column chromatography on silica gel (CHCl<sub>3</sub>/EtOAc = 20/1). The three compounds **1**, **2** and **6** were cleanly separated and each fraction was recrystallized from ethyl acetate/acetonitrile.

**Compound 1:** Yield 0.025 g (3%); mp 151 °C; <sup>1</sup>H NMR (400 MHz, CDCl<sub>3</sub>) δ 8.67 (br s, 2H, NH), 7.08 (br s, 2H, NH), 6.30 (d, *J* = 1.73 Hz, 4H, Ar-H), 5.96 (s, 2H, Ar-H), 5.83-5.80 (m, 8H, pyrrole-H), 4.26-4.20 (m, 4H, CH<sub>2</sub>), 4.10-4.03 (m, 4H, CH<sub>2</sub>), 2.27 (s, 6H, CH<sub>3</sub>), 2.02-1.94 (m, 4H, CH<sub>2</sub>), 1.79-1.70 (m, 4H, CH<sub>2</sub>), 1.64-1.58 (m, 8H, CH<sub>2</sub>), 1.55 (s, 12H, CH<sub>3</sub>), 1.35-1.28 (m, 8H, CH<sub>2</sub>); <sup>13</sup>C NMR (100 MHz, CDCl<sub>3</sub>) δ 158.7, 140.7, 138.5, 137.5, 107.7, 104.2, 102.9, 68.1, 53.4, 41.1, 38.7, 27.1, 23.9, 21.9, 21.8; UV-Vis. λ<sub>max</sub> (ε × 10<sup>3</sup>), 241 (1.40), 275 (0.44), 282 (0.41); IR (cm<sup>-1</sup>, neat) 3427, 3105, 2934, 2867, 1589; MALDI-TOF MS calcd. for C<sub>54</sub>H<sub>70</sub>N<sub>4</sub>O<sub>4</sub> exact mass 837.14, found 837.52 (M<sup>+</sup>), 839.52 (M+2H<sup>+</sup>).

**Compound 2:** Yield 0.023 g (3%); mp 240 °C (decomp); <sup>1</sup>H NMR (400 MHz, CDCl<sub>3</sub>) δ 6.99 (br s, 2H, NH), 6.82 (br s, 2H, NH), 6.28 (d, *J* = 1.57 Hz, 4H, Ar-H), 6.00 (s, 2H, Ar-H), 5.87-5.83 (m, 8H, pyrrole-H), 4.02-3.91 (m, 8H, CH<sub>2</sub>), 2.23 (s, 6H, CH<sub>3</sub>), 1.99-1.91 (m, 4H, CH<sub>2</sub>), 1.77-1.60 (m, 12H, CH<sub>2</sub>), 1.49 (s, 12H, CH<sub>3</sub>), 1.36-1.25 (m, 4H, CH<sub>2</sub>), 1.01-0.980 (m, 4H, CH<sub>2</sub>); <sup>13</sup>C NMR (100 MHz, CDCl<sub>3</sub>) δ 158.9, 140.7, 138.5, 136.4, 109.7, 104.7, 102.7, 94.2, 67.0, 40.2, 38.7, 28.4, 25.3, 21.5, 20.0; UV-Vis. λ<sub>max</sub> (ε × 10<sup>3</sup>), 242 (1.40), 275 (0.34), 282 (0.31); IR (cm<sup>-1</sup>, neat) 3438, 3377, 2937, 2866, 1590; MALDI-TOF MS calcd. for C<sub>54</sub>H<sub>70</sub>N<sub>4</sub>O<sub>4</sub> exact mass 837.14, found 837.59 (M<sup>+</sup>), 869.57 (M+Na<sup>+</sup>).

**Compound 6:** Yield 0.059 g (10%); <sup>1</sup>H NMR (300 MHz, CDCl<sub>3</sub>) δ 7.56 (br s, 2H, NH), 7.13 (br s, 1H, NH), 6.46-6.43 (m, 2H, pyrrole-H), 6.30-6.29 (m, 2H, Ar-H), 6.13-6.11 (m, 1H, Ar-H), 6.03-6.00 (m, 2H, pyrrole-H), 5.97 (d, *J* = 2.69 Hz, 2H, pyrrole-H), 5.89-5.86 (m, 2H, pyrrole-H), 4.01 (t, *J* = 6.70 Hz, 4H, CH<sub>2</sub>), 2.27 (s, 3H, CH<sub>3</sub>), 2.08-2.00 (m, 2H, CH<sub>2</sub>), 1.83-1.74 (m, 2H, CH<sub>2</sub>), 1.71-1.62 (m, 4H, CH<sub>2</sub>), 1.52 (s, 6H, CH<sub>3</sub>), 1.34-1.21 (m, 4H, CH<sub>2</sub>); <sup>13</sup>C NMR (100 MHz, CDCl<sub>3</sub>) δ 159.3, 140.7, 138.4, 136.7, 116.6, 108.8, 107.9, 104.7, 104.0, 97.1, 67.3, 41.0, 39.3, 28.5, 25.9, 21.7, 21.1; UV-Vis. λ<sub>max</sub> (ε × 10<sup>3</sup>), 242 (1.1), 275 (0.26), 282 (0.25); MALDI-TOF MS calcd. for C<sub>31</sub>H<sub>39</sub>N<sub>3</sub>O<sub>2</sub> exact mass 485.66, found 486.33 (M+H<sup>+</sup>), 508.32 (M+Na<sup>+</sup>).



PJY-TPM

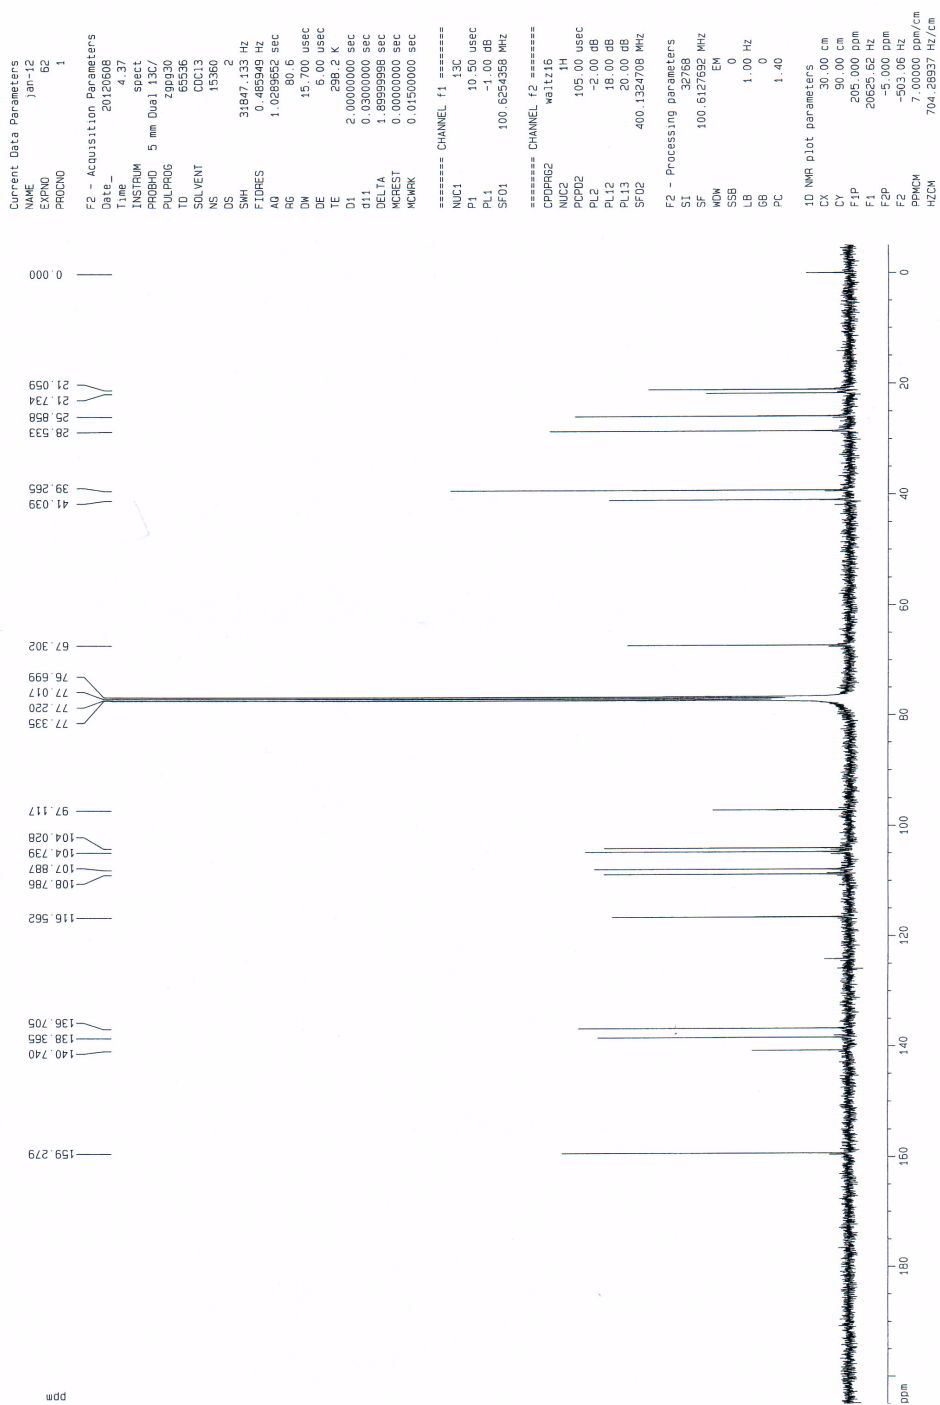

Figure S2. MALDI-TOF spectrum of compound 6.

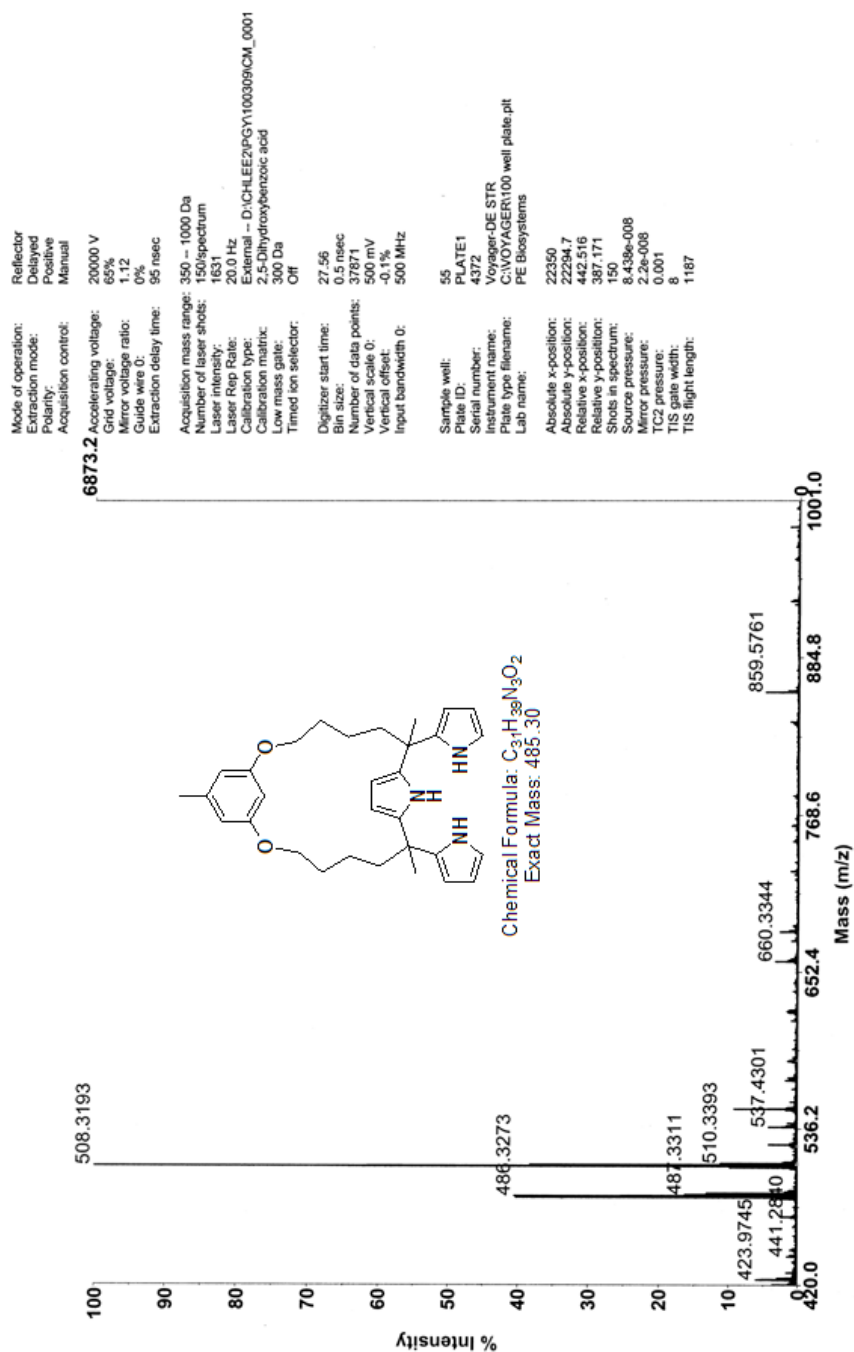

Spectrum 12. MALDI-TOF spectrum of ether strapped TPM 38

Figure S3. 300 MHz <sup>1</sup>H NMR spectrum of compound **1** in CDCl<sub>3</sub>.

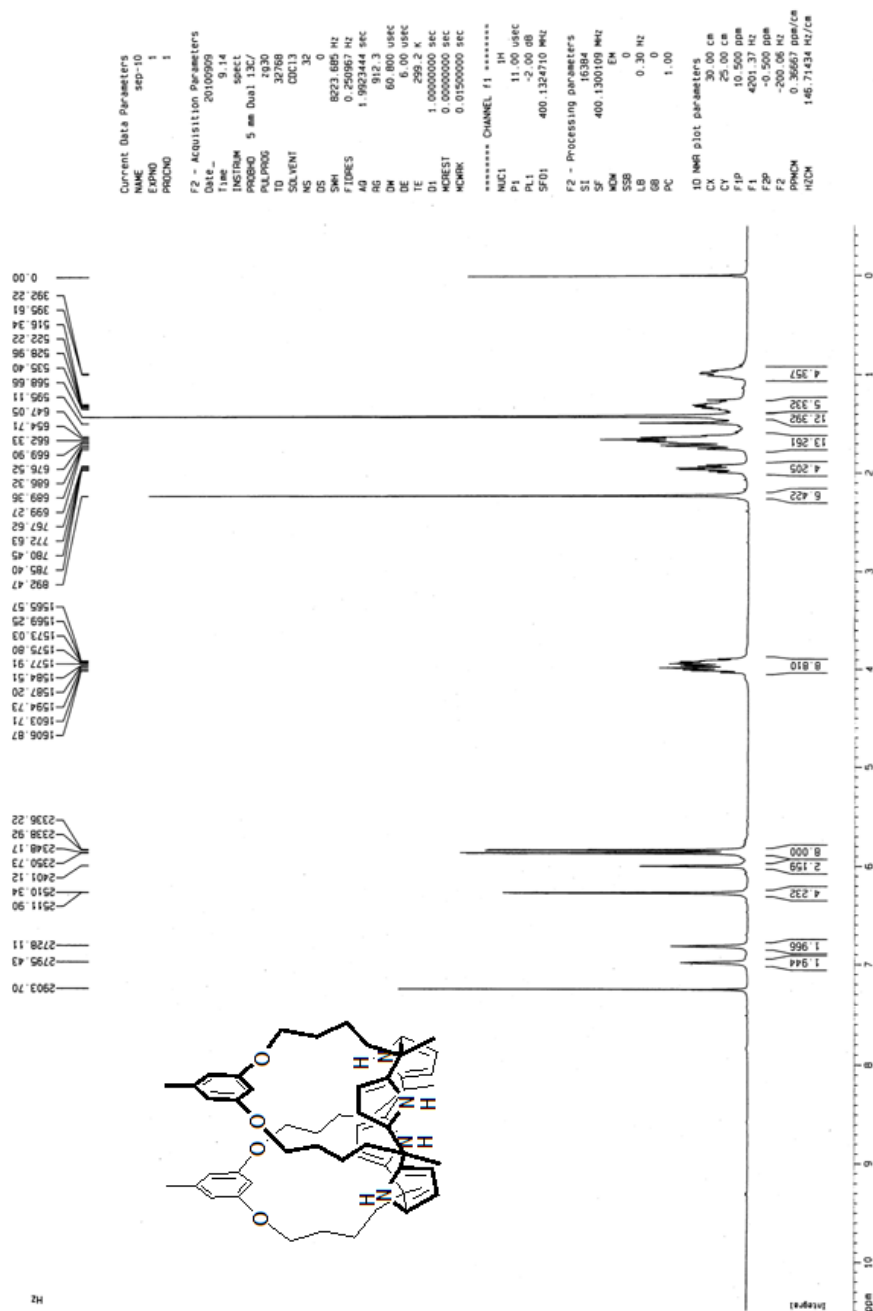

Spectrum 7. <sup>1</sup>H NMR spectrum of doubly ether strapped calix[4]pyrrole **37** in CDCl<sub>3</sub>

Figure S4.  $^{13}\text{C}$  NMR spectrum of compound **1** in  $\text{CDCl}_3$ .

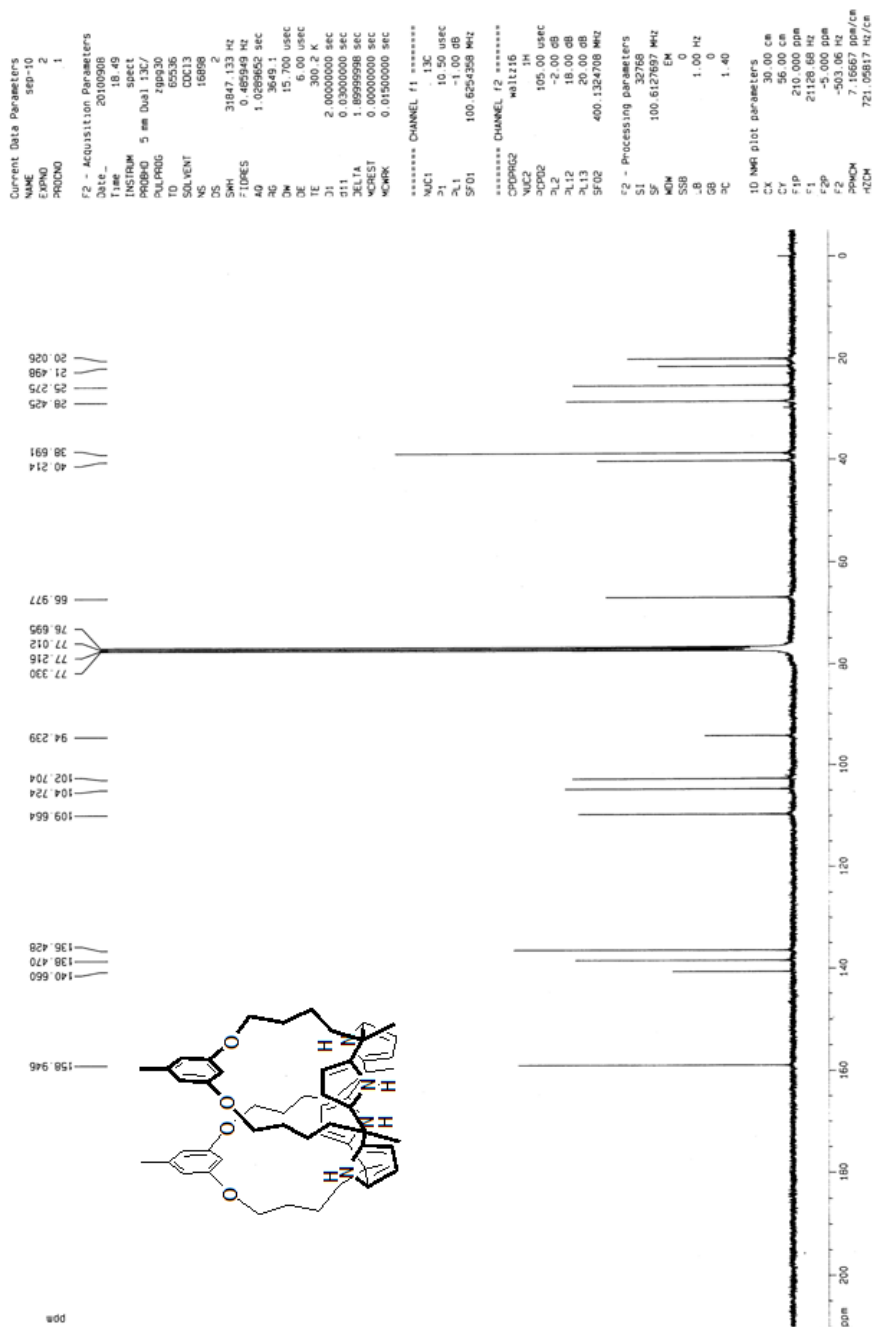

Spectrum 8.  $^{13}\text{C}$  NMR spectrum of doubly ether strapped calix[4]pyrrole **37** in  $\text{CDCl}_3$



Figure S5. MALDI-TOF mass spectrum of compound 1.

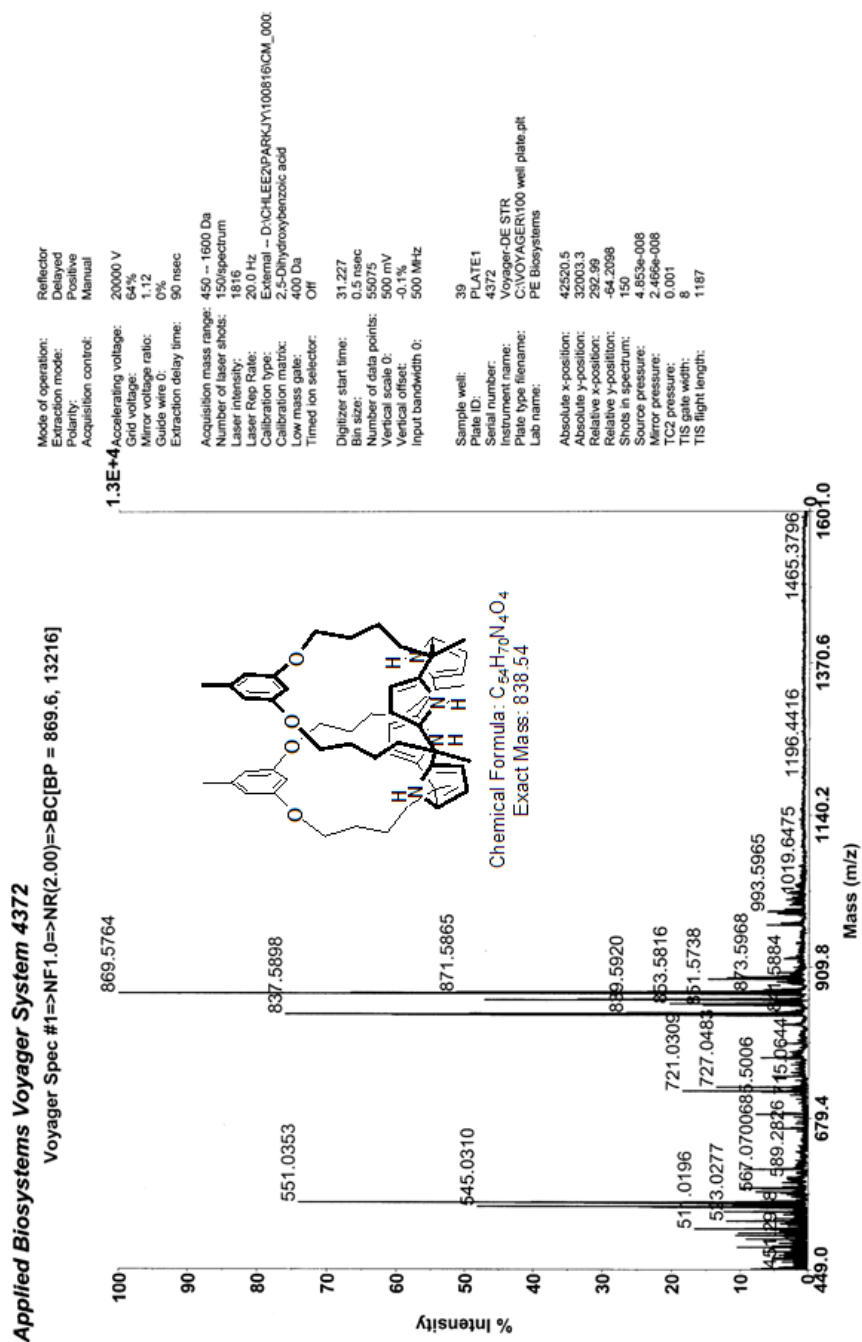

Spectrum 9. MALDI-TOF spectrum of doubly ether strapped calix[4]pyrrole 37

Figure S6. IR spectra of compound 1 (a) and 2 (b).

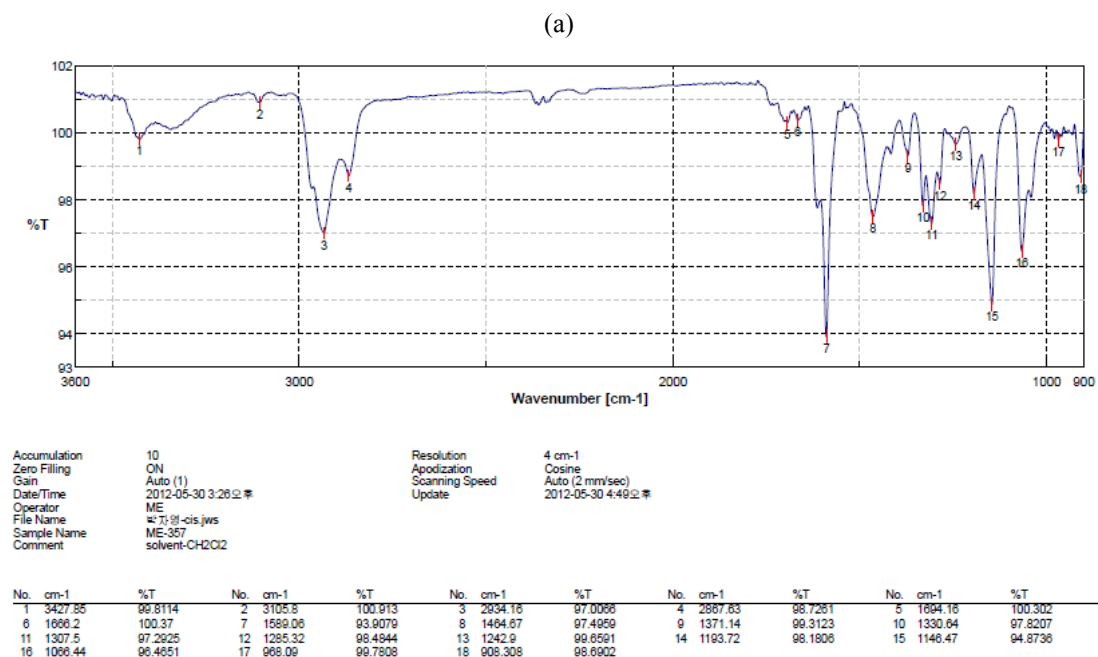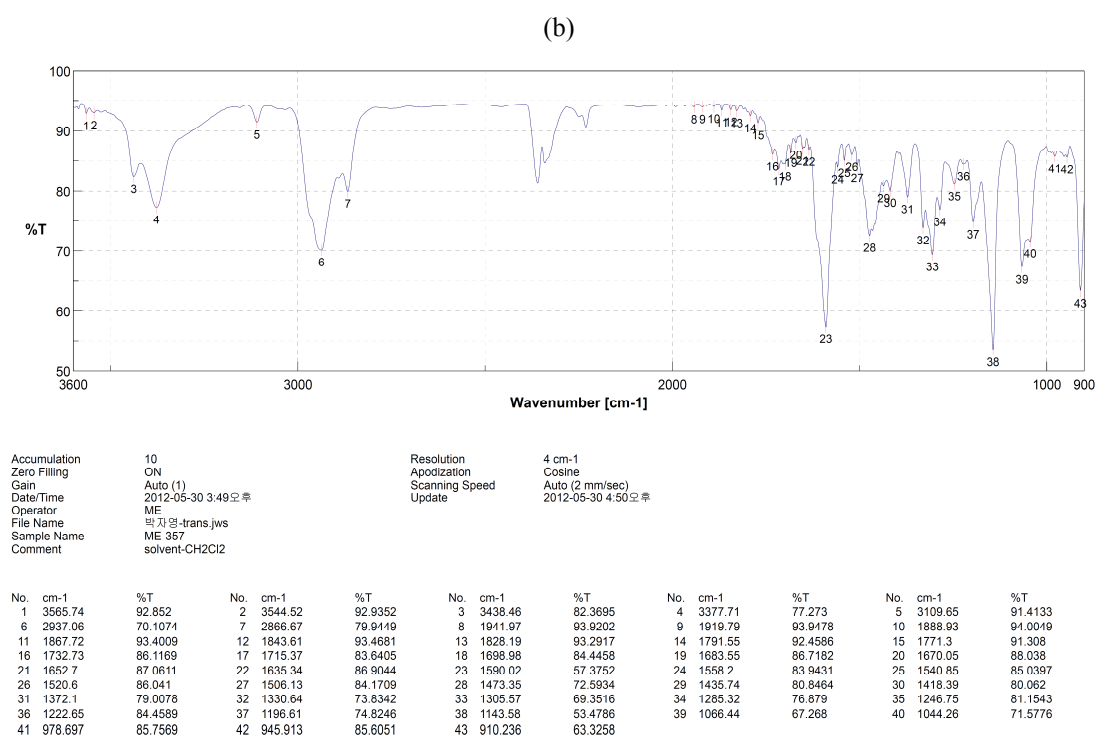



**Figure S7.** UV-vis absorption spectra of compound **1** (dash) and **2** (line) in  $\text{CHCl}_3$ .  $[\mathbf{1}] = [\mathbf{2}] = 4.0 \times 10^{-4} \text{ M}$ .

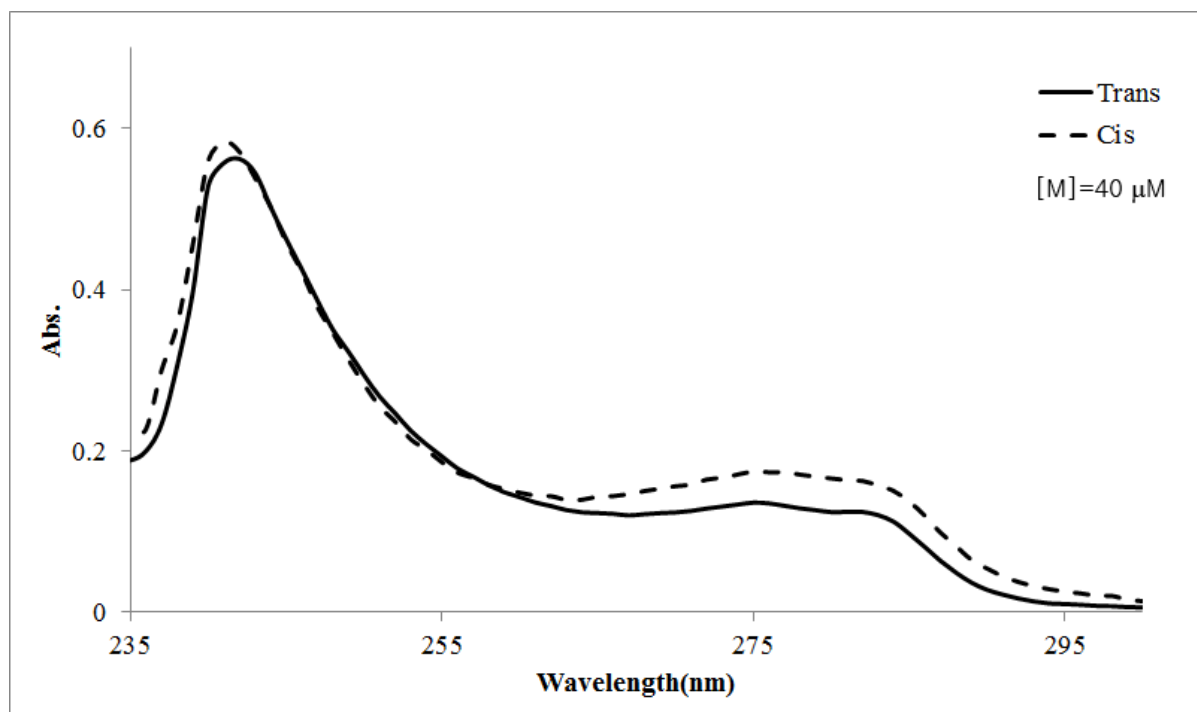

Figure S8. 300 MHz  $^1\text{H}$  NMR spectrum of compound **2** in  $\text{CDCl}_3$ .

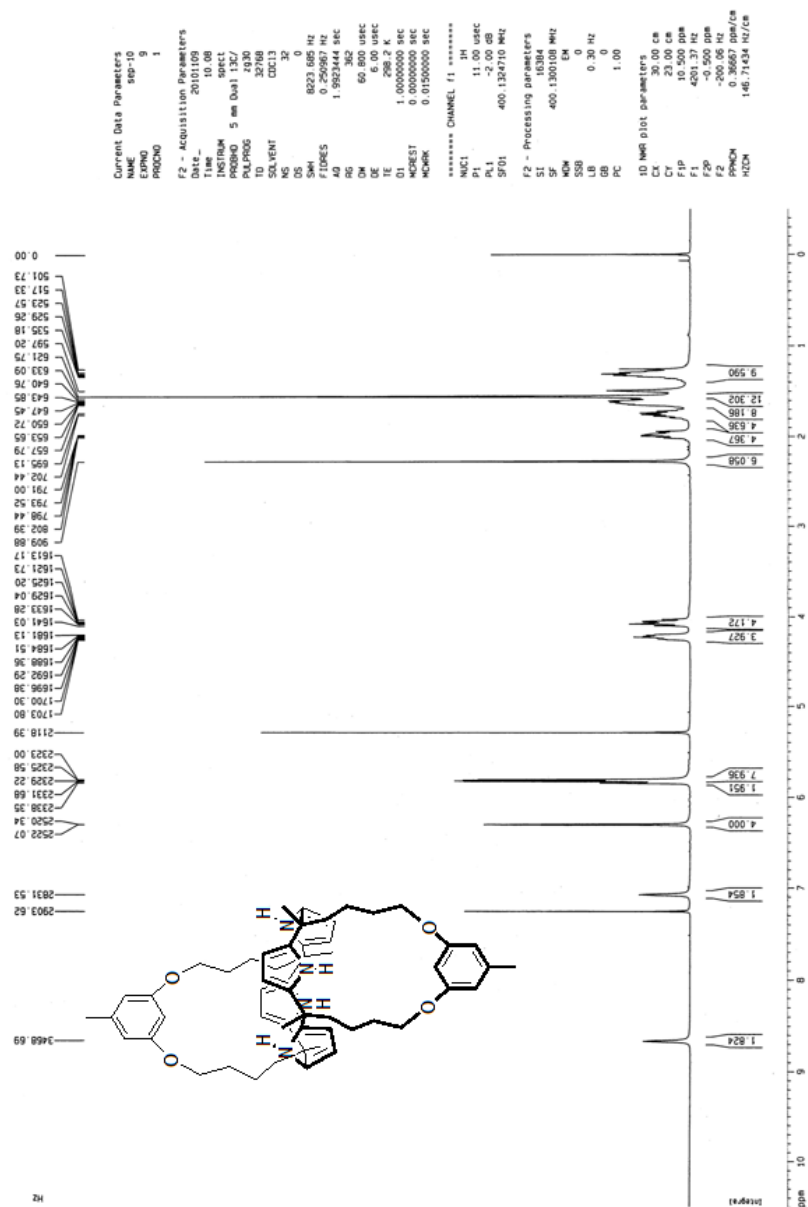

Spectrum 4.  $^1\text{H}$  NMR spectrum of doubly ether strapped calix[4]pyrrole **36** in  $\text{CDCl}_3$

Figure S9.  $^{13}\text{C}$  NMR spectrum of compound **2** in  $\text{CDCl}_3$ .

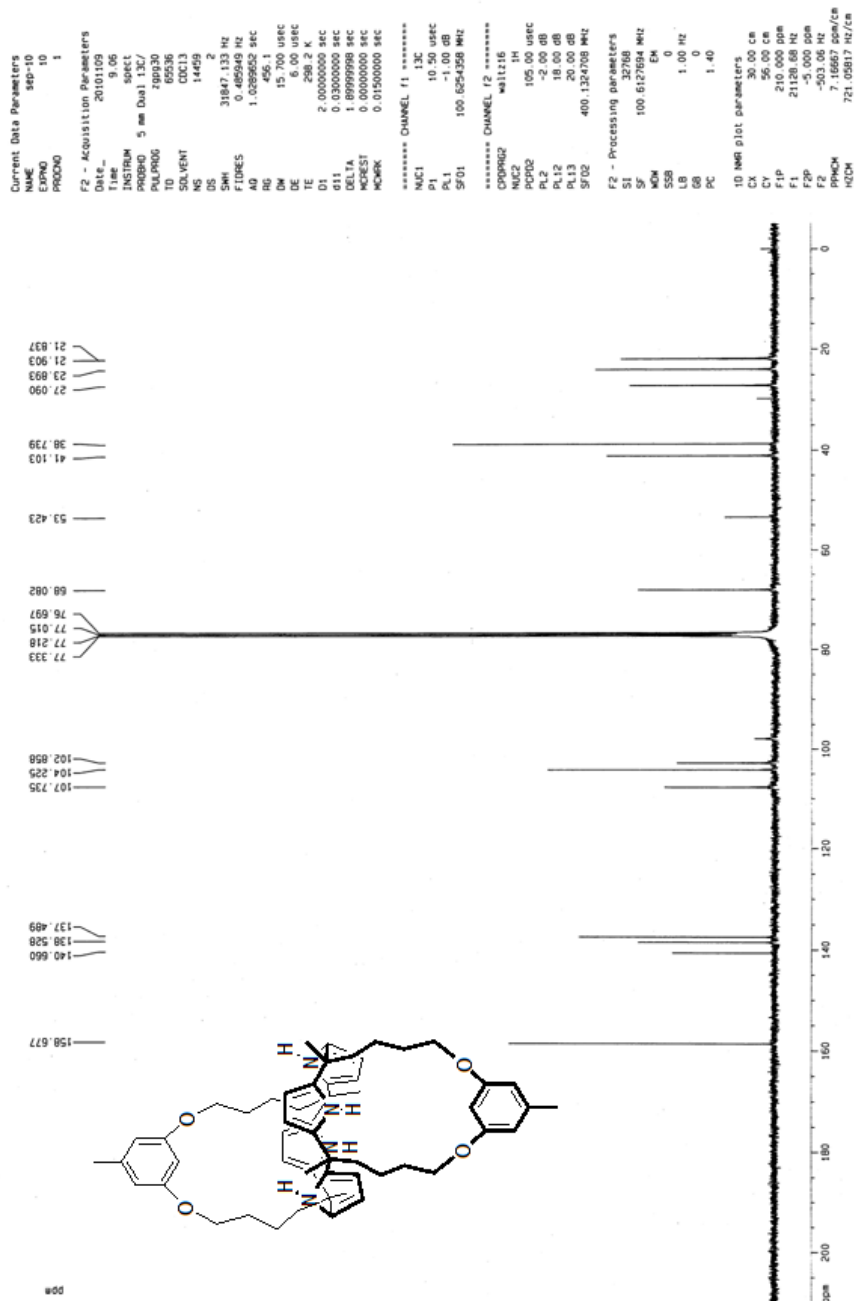

Spectrum 5.  $^{13}\text{C}$  NMR spectrum of doubly ether strapped calix[4]pyrrole **36** in  $\text{CDCl}_3$

Figure S10. MALDI-TOF mass spectrum of compound **2** in CDCl<sub>3</sub>.

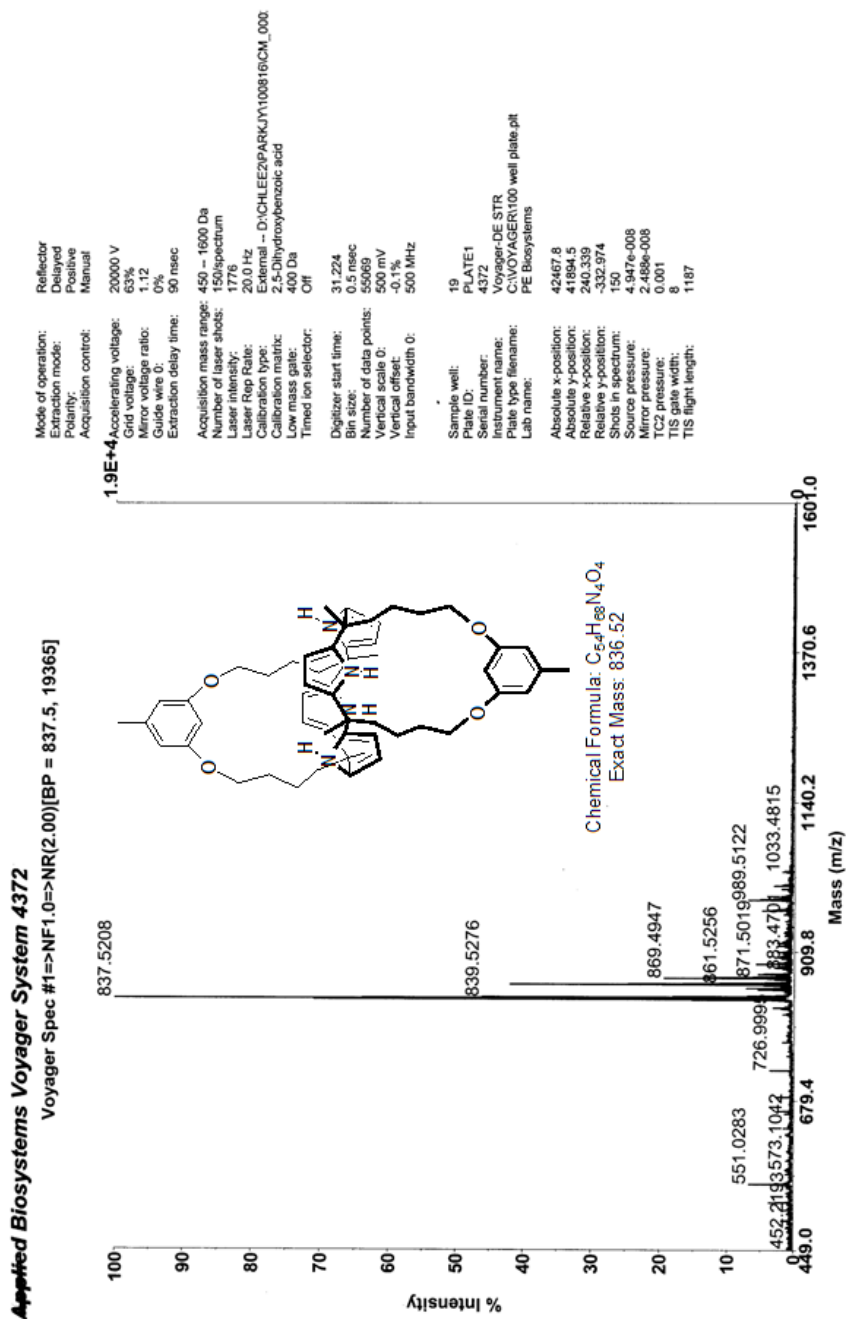

Spectrum 6. MALDI-TOF spectrum of doubly ether strapped calix[4]pyrrole **36**

Figure S11. HETCO spectrum of compound **1** in CDCl<sub>3</sub>.

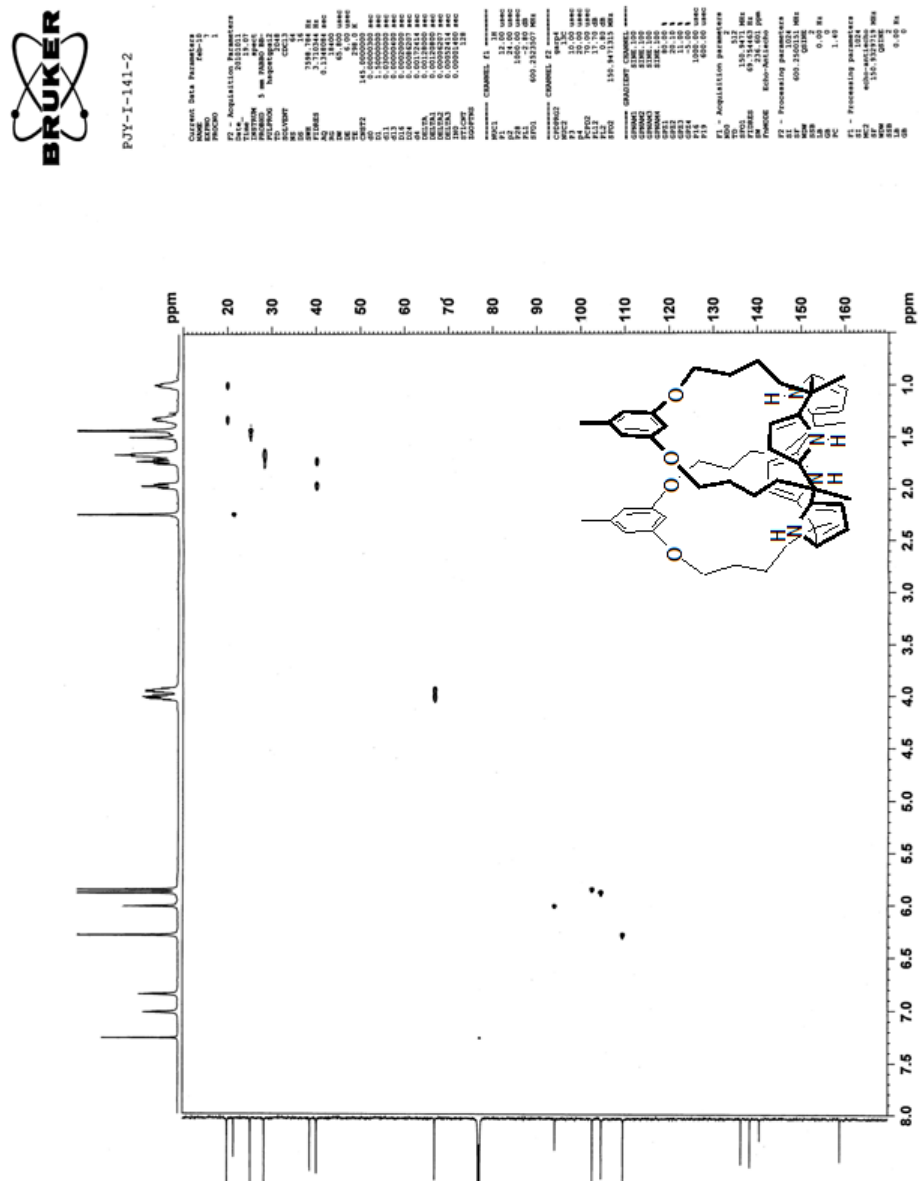

Spectrum 10. H-C HECTCO spectrum of doubly ether strapped calix[4]pyrrole **37** in CDCl<sub>3</sub>



**Figure S12.**  $^1\text{H}$  NMR spectral changes of receptor **2** upon addition of fluoride anion (as its tetrabutyl ammonium salt) in  $\text{CDCl}_3$ .

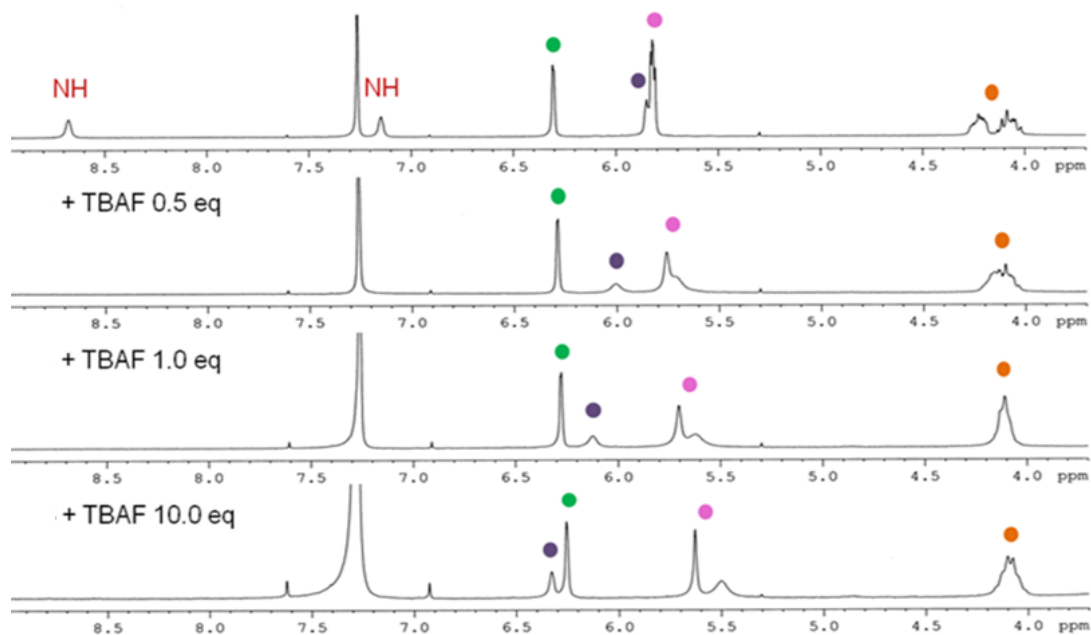

**Figure S13.** Changes in the  $^1\text{H}$  NMR spectra of receptor **1** following the addition of fluoride anions (as its tetrabutyl ammonium salt) in  $\text{CDCl}_3$ .

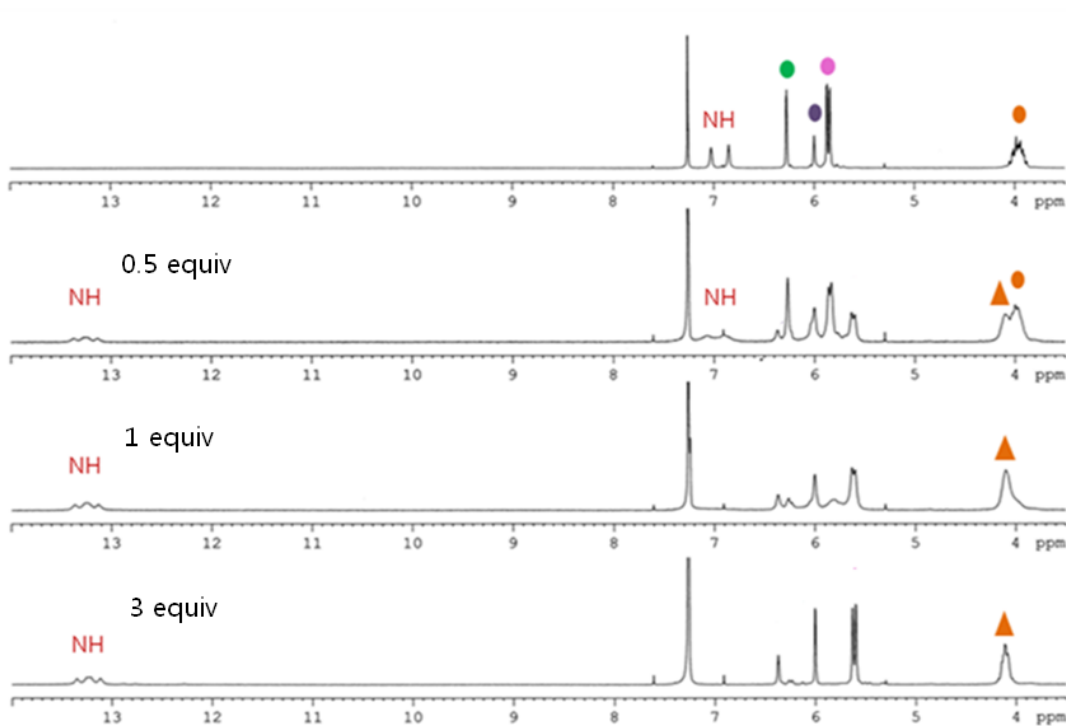

**Figure S14.**  $^1\text{H}$  NMR spectral changes of receptor **2** upon addition of chloride anion (as its tetrabutyl ammonium salt) in  $\text{CDCl}_3$ .

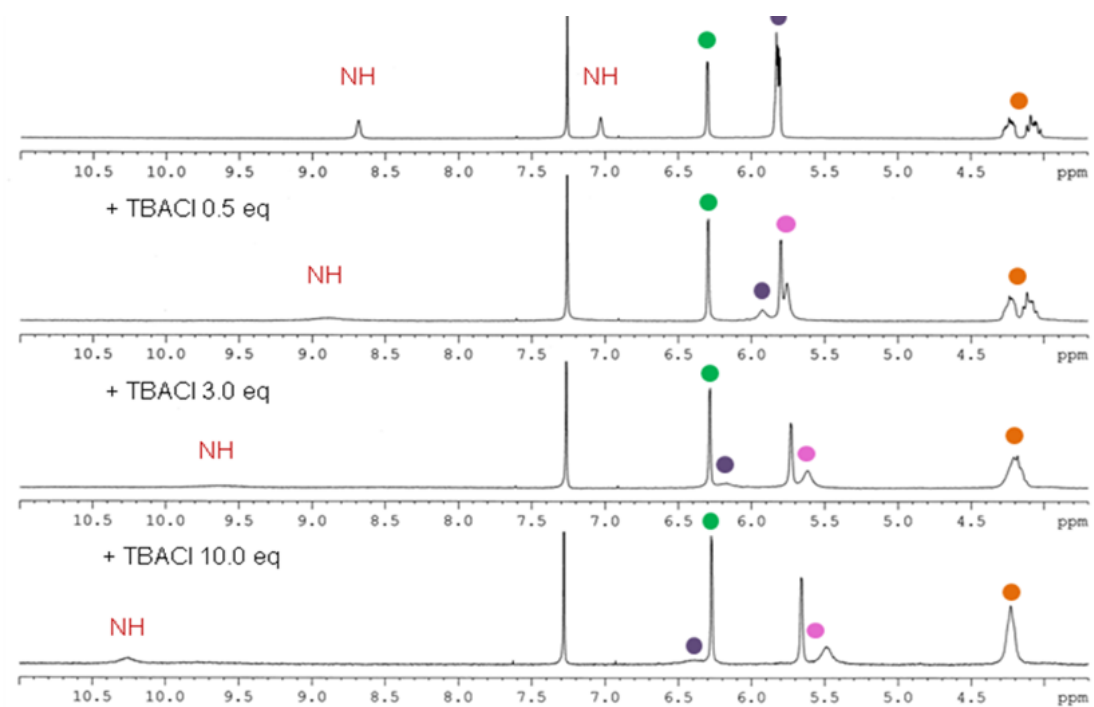

**Table 1.** Melting Points and UV-vis absorption data of compound **1**, **2** and **6**.

| compound           | <b>2</b>                                                                                  | <b>1</b>                                                                                  | <b>6</b>                                                                                  |
|--------------------|-------------------------------------------------------------------------------------------|-------------------------------------------------------------------------------------------|-------------------------------------------------------------------------------------------|
| m.p                | 240 °C                                                                                    | 151 °C                                                                                    | 206 °C                                                                                    |
| Molar absorptivity | 242 nm = $1.40 \times 10^4$<br>275 nm = $3.40 \times 10^3$<br>282 nm = $3.12 \times 10^3$ | 241 nm = $1.46 \times 10^4$<br>275 nm = $4.37 \times 10^3$<br>282 nm = $4.08 \times 10^3$ | 242 nm = $1.08 \times 10^4$<br>275 nm = $2.65 \times 10^3$<br>282 nm = $2.45 \times 10^3$ |

**Figure S15.** UV-vis absorption spectra of compound **1**, **2** and **6**.

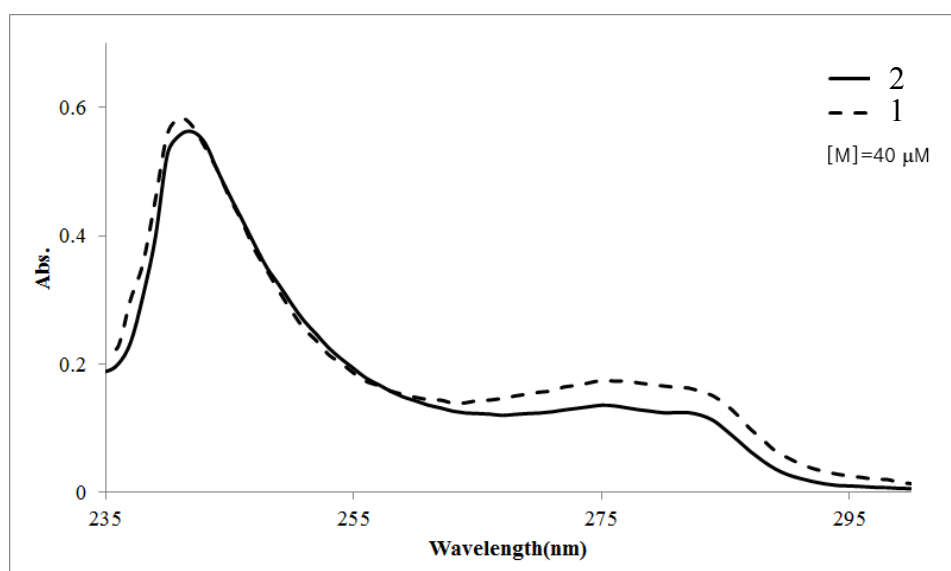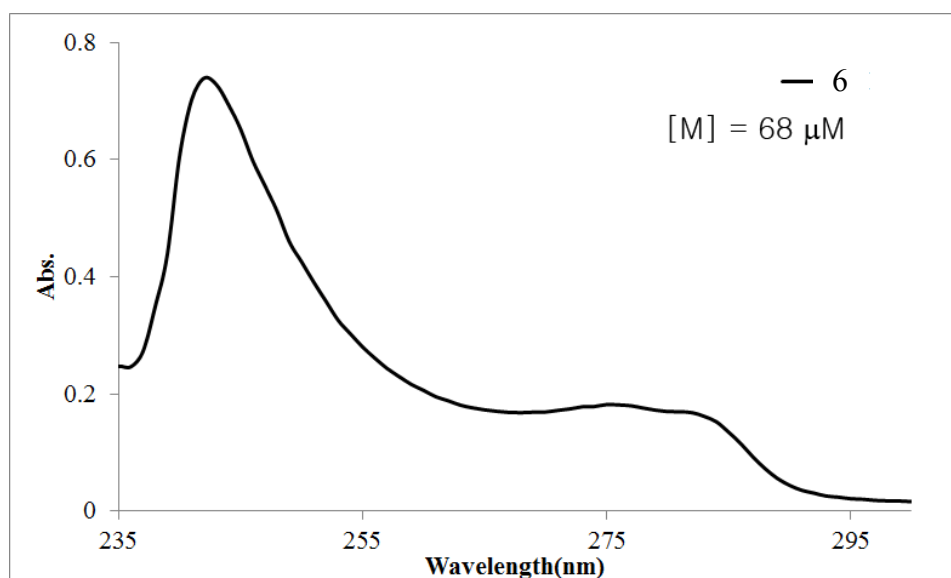

### ITC Titration Data

Microcalorimetric titrations were performed using an isothermal titration calorimeter (ITC). The ORIGIN software provided by Microcal Inc. was used to calculate the binding constant ( $K_a$ ). The solvents  $\text{CH}_2\text{Cl}_2$ , were purchased from Daejung respectively. The curve shows the fit of the experimental data to a 1:1 binding mode.

**Table 2.** Calculated association constants and thermodynamic parameters for receptors **1** and **2** with various anions (as their tetrabutyl ammonium salt) in acetonitrile at 25°C.  $[\mathbf{1}] = 0.05 \text{ mM}$  and  $[\mathbf{2}] = 0.05 \text{ mM}$ .

|                | <b>1</b>   |            |            |                    | <b>2</b>   |            |            |                    |
|----------------|------------|------------|------------|--------------------|------------|------------|------------|--------------------|
|                | $\Delta G$ | $\Delta H$ | $\Delta S$ | $K_a$              | $\Delta G$ | $\Delta H$ | $\Delta S$ | $K_a$              |
| $\text{Cl}^-$  | -7.39      | -8.35      | -3.22      | $2.62 \times 10^5$ | -5.95      | -9.89      | -13.2      | $2.31 \times 10^4$ |
| $\text{Br}^-$  | -5.16      | -15.3      | -34.0      | $5.74 \times 10^3$ | -4.21      | -10.5      | -21.1      | $1.14 \times 10^3$ |
| $\text{I}^-$   | -3.81      | -7.33      | -11.8      | $6.10 \times 10^2$ | -3.17      | -19.81     | -55.8      | $2.06 \times 10^2$ |
| $\text{AcO}^-$ | -6.71      | -8.59      | -6.28      | $8.34 \times 10^4$ | -5.89      | -7.37      | -4.95      | $2.09 \times 10^4$ |

**Figure S16.** ITC titration curves produced from the titration of 1 and 2 with chloride anion (as its tetrabutylammonium salt) in acetonitrile at 25 °C.  $[1]=[2]=0.5\text{ mM}$ ,  $[\text{TBACl}]=13.1\text{ mM}$ .

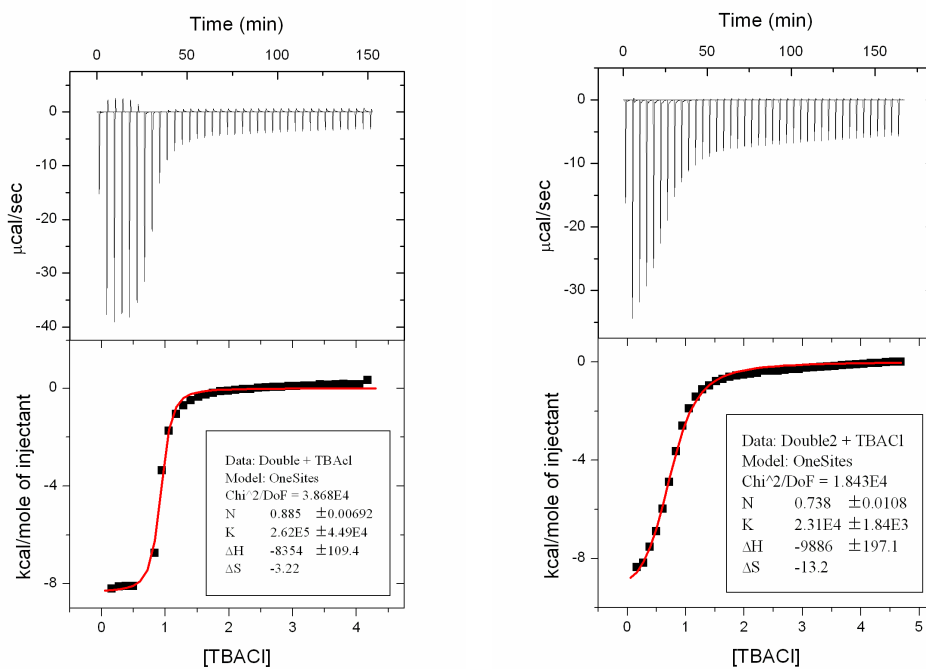

**Figure S17.** ITC titration curves produced from the titration of 1 and 2 with bromide anion (as its tetrabutylammonium salt) in acetonitrile at 25 °C.  $[1]=[2]=0.5\text{ mM}$ ,  $[\text{TBACl}]=13.1\text{ mM}$ .

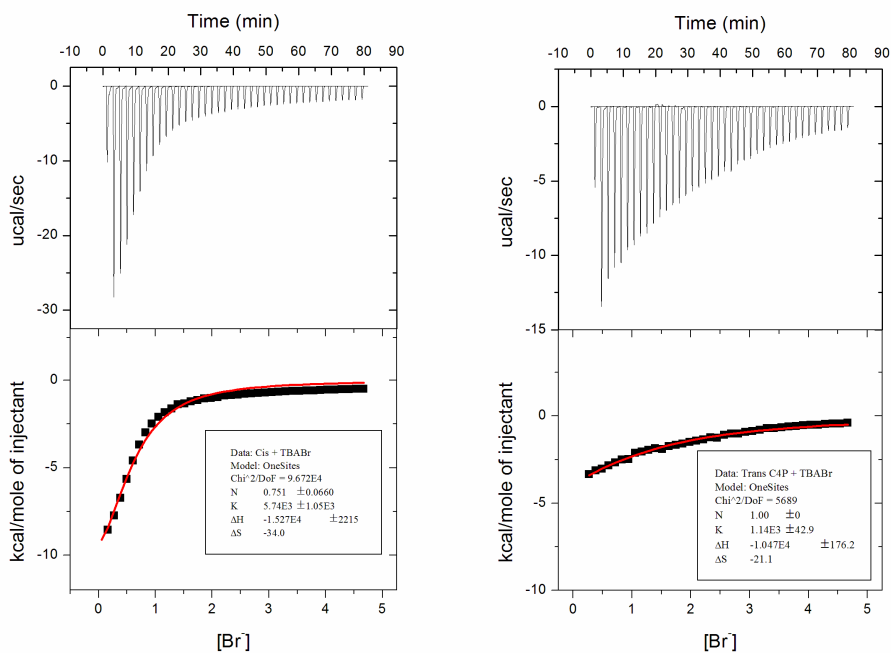

**Figure S18.** ITC titration curves produced from the titration of 1 and 2 with iodide anion (as its tetrabutylammonium salt) in acetonitrile at 25 °C.  $[1]=[2]=0.5\text{ mM}$ ,  $[\text{TBACl}]=13.1\text{ mM}$ .

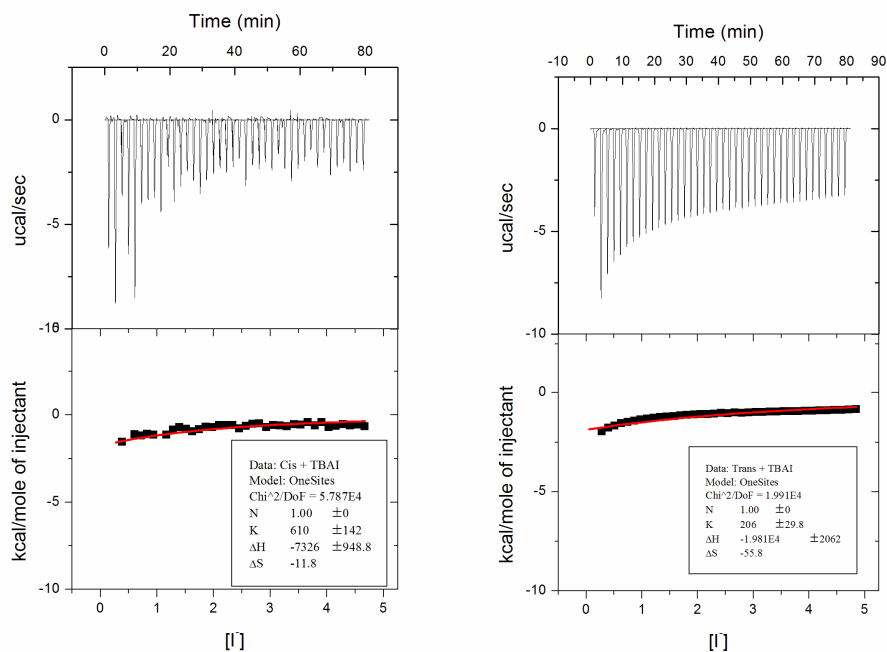

**Figure S19.** ITC titration curves produced from the titration of 1 and 2 with acetate anion (as its tetrabutylammonium salt) in acetonitrile at 25 °C.  $[1]=[2]=0.5\text{ mM}$ ,  $[\text{TBACl}]=13.1\text{ mM}$ .

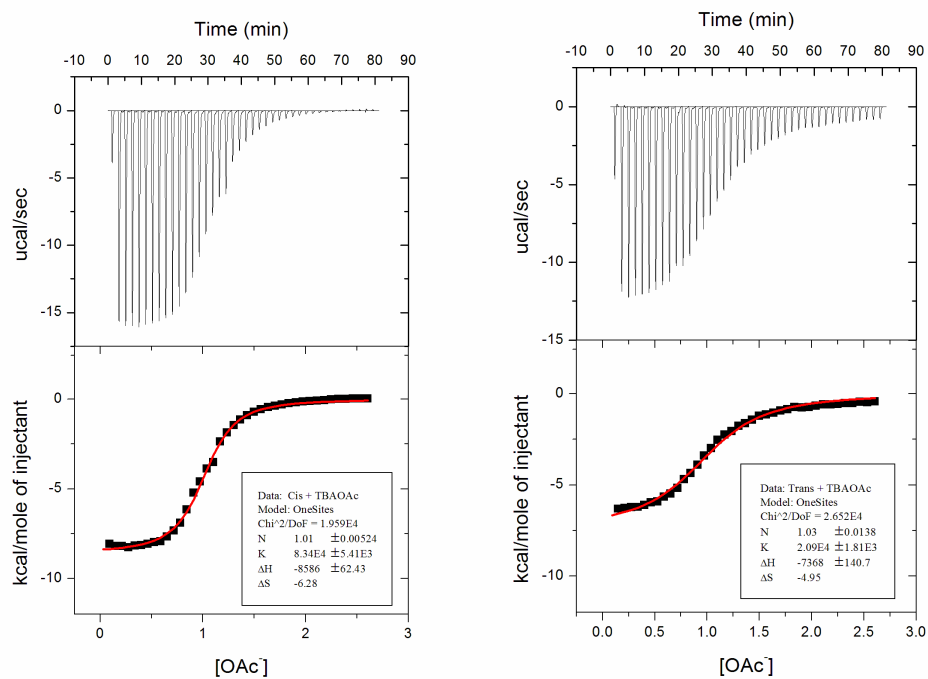

## Single Crystal data

**Table 1.** Crystal data and structure refinement for compound **1**.

|                                   |                                                               |          |
|-----------------------------------|---------------------------------------------------------------|----------|
| Identification code               | 01211chl                                                      |          |
| Empirical formula                 | C <sub>55</sub> H <sub>68</sub> N <sub>4</sub> O <sub>5</sub> |          |
| Formula weight                    | 865.13                                                        |          |
| Temperature                       | 93(2) K                                                       |          |
| Wavelength                        | 1.54187 Å                                                     |          |
| Crystal system                    | Orthorhombic                                                  |          |
| Space group                       | P ccn                                                         |          |
| Unit cell dimensions              | a = 34.4374(8) Å                                              | α = 90°. |
|                                   | b = 10.2869(2) Å                                              | β = 90°. |
|                                   | c = 13.5539(3) Å                                              | γ = 90°. |
| Volume                            | 4801.52(18) Å <sup>3</sup>                                    |          |
| Z                                 | 4                                                             |          |
| Density (calculated)              | 1.197 Mg/m <sup>3</sup>                                       |          |
| Absorption coefficient            | 0.600 mm <sup>-1</sup>                                        |          |
| F(000)                            | 1864                                                          |          |
| Crystal size                      | 0.10 x 0.10 x 0.05 mm <sup>3</sup>                            |          |
| Theta range for data collection   | 5.14 to 68.24°.                                               |          |
| Index ranges                      | -41 ≤ h ≤ 41, -11 ≤ k ≤ 11, -16 ≤ l ≤ 16                      |          |
| Reflections collected             | 47801                                                         |          |
| Independent reflections           | 4347 [R(int) = 0.0676]                                        |          |
| Completeness to theta = 68.24°    | 98.5 %                                                        |          |
| Absorption correction             | Semi-empirical from equivalents                               |          |
| Max. and min. transmission        | 0.9706 and 0.9424                                             |          |
| Refinement method                 | Full-matrix least-squares on F <sup>2</sup>                   |          |
| Data / restraints / parameters    | 4347 / 0 / 299                                                |          |
| Goodness-of-fit on F <sup>2</sup> | 1.102                                                         |          |
| Final R indices [I > 2σ(I)]       | R1 = 0.0642, wR2 = 0.1634                                     |          |
| R indices (all data)              | R1 = 0.1136, wR2 = 0.2029                                     |          |
| Largest diff. peak and hole       | 0.286 and -0.257 e.Å <sup>-3</sup>                            |          |

Table 2. Atomic coordinates ( $\times 10^4$ ) and equivalent isotropic displacement parameters ( $\text{\AA}^2 \times 10^3$ )  
 For compound 1.  $U(\text{eq})$  is defined as one third of the trace of the orthogonalized  $U^{ij}$  tensor.

|       | x       | y        | z       | $U(\text{eq})$ |
|-------|---------|----------|---------|----------------|
| O(1)  | 4936(1) | 3305(2)  | 5295(2) | 67(1)          |
| O(2)  | 5564(1) | -763(2)  | 6137(2) | 68(1)          |
| N(2)  | 7326(1) | 4667(2)  | 3498(2) | 68(1)          |
| N(1)  | 6834(1) | 1849(2)  | 3689(2) | 64(1)          |
| C(22) | 7599(1) | 5288(3)  | 4078(2) | 66(1)          |
| C(16) | 6607(1) | 4167(3)  | 3439(2) | 62(1)          |
| C(1)  | 4700(1) | 1973(3)  | 6562(2) | 65(1)          |
| C(12) | 5184(1) | 3463(3)  | 4444(2) | 66(1)          |
| C(23) | 6966(1) | 4681(3)  | 3942(2) | 63(1)          |
| C(13) | 5586(1) | 3923(3)  | 4710(2) | 61(1)          |
| C(2)  | 5280(1) | 165(3)   | 6246(2) | 63(1)          |
| C(18) | 6654(1) | 2771(3)  | 3112(2) | 61(1)          |
| C(14) | 6271(1) | 4255(3)  | 4200(2) | 64(1)          |
| C(19) | 6823(1) | 632(3)   | 3249(2) | 62(1)          |
| C(15) | 5876(1) | 3784(3)  | 3868(2) | 65(1)          |
| C(3)  | 4706(1) | 842(3)   | 7120(2) | 67(1)          |
| C(4)  | 5000(1) | -60(3)   | 6959(2) | 66(1)          |
| C(26) | 7017(1) | -1659(3) | 2949(2) | 72(1)          |
| C(8)  | 5835(1) | -571(3)  | 5342(2) | 65(1)          |
| C(27) | 6994(1) | -545(3)  | 3720(2) | 65(1)          |
| C(20) | 6626(1) | 805(3)   | 2379(2) | 65(1)          |
| C(9)  | 6075(1) | -1776(3) | 5212(2) | 67(1)          |
| C(10) | 6356(1) | -1614(3) | 4336(2) | 66(1)          |
| C(24) | 7013(1) | 5329(3)  | 4820(2) | 71(1)          |
| C(21) | 6521(1) | 2130(3)  | 2296(2) | 67(1)          |
| C(5)  | 4975(1) | 2185(3)  | 5836(2) | 63(1)          |
| C(25) | 7405(1) | 5713(3)  | 4908(2) | 71(1)          |
| C(17) | 6515(1) | 5017(3)  | 2537(2) | 71(1)          |
| C(28) | 6740(1) | -993(3)  | 4613(2) | 66(1)          |
| C(6)  | 4391(1) | 583(4)   | 7861(2) | 79(1)          |
| C(7)  | 5269(1) | 1278(3)  | 5673(2) | 63(1)          |
| O(3)  | 7500    | 2500     | 1969(4) | 126(3)         |
| C(31) | 7500    | 2500     | 1048(7) | 122(2)         |
| O(4)  | 7500    | 2500     | 189(11) | 114(7)         |



Table 3. Bond lengths [Å] and angles [°] for compound 1.

---

|               |          |
|---------------|----------|
| O(1)-C(5)     | 1.372(3) |
| O(1)-C(12)    | 1.444(3) |
| O(2)-C(2)     | 1.374(3) |
| O(2)-C(8)     | 1.441(3) |
| N(2)-C(23)    | 1.376(3) |
| N(2)-C(22)    | 1.382(4) |
| N(2)-H(1)     | 0.8800   |
| N(1)-C(18)    | 1.377(4) |
| N(1)-C(19)    | 1.387(4) |
| N(1)-H(2)     | 0.8800   |
| C(22)-C(25)   | 1.379(4) |
| C(22)-C(27)#1 | 1.507(4) |
| C(16)-C(23)   | 1.507(4) |
| C(16)-C(18)   | 1.511(4) |
| C(16)-C(17)   | 1.537(4) |
| C(16)-C(14)   | 1.553(4) |
| C(1)-C(5)     | 1.384(4) |
| C(1)-C(3)     | 1.387(4) |
| C(1)-H(3)     | 0.9500   |
| C(12)-C(13)   | 1.506(4) |
| C(12)-H(10)   | 0.9900   |
| C(12)-H(11)   | 0.9900   |
| C(23)-C(24)   | 1.374(4) |
| C(13)-C(15)   | 1.523(4) |
| C(13)-H(12)   | 0.9900   |
| C(13)-H(13)   | 0.9900   |
| C(2)-C(7)     | 1.384(4) |
| C(2)-C(4)     | 1.385(4) |
| C(18)-C(21)   | 1.367(4) |
| C(14)-C(15)   | 1.514(4) |
| C(14)-H(14)   | 0.9900   |
| C(14)-H(15)   | 0.9900   |
| C(19)-C(20)   | 1.373(4) |
| C(19)-C(27)   | 1.490(4) |
| C(15)-H(16)   | 0.9900   |
| C(15)-H(17)   | 0.9900   |
| C(3)-C(4)     | 1.391(4) |

|                  |           |
|------------------|-----------|
| C(3)-C(6)        | 1.503(4)  |
| C(4)-H(4)        | 0.9500    |
| C(26)-C(27)      | 1.552(4)  |
| C(26)-H(18)      | 0.9800    |
| C(26)-H(19)      | 0.9800    |
| C(26)-H(20)      | 0.9800    |
| C(8)-C(9)        | 1.501(4)  |
| C(8)-H(21)       | 0.9900    |
| C(8)-H(22)       | 0.9900    |
| C(27)-C(22)#1    | 1.507(4)  |
| C(27)-C(28)      | 1.563(4)  |
| C(20)-C(21)      | 1.415(4)  |
| C(20)-H(5)       | 0.9500    |
| C(9)-C(10)       | 1.542(4)  |
| C(9)-H(23)       | 0.9900    |
| C(9)-H(24)       | 0.9900    |
| C(10)-C(28)      | 1.517(4)  |
| C(10)-H(25)      | 0.9900    |
| C(10)-H(26)      | 0.9900    |
| C(24)-C(25)      | 1.411(4)  |
| C(24)-H(6)       | 0.9500    |
| C(21)-H(7)       | 0.9500    |
| C(5)-C(7)        | 1.394(4)  |
| C(25)-H(8)       | 0.9500    |
| C(17)-H(27)      | 0.9800    |
| C(17)-H(28)      | 0.9800    |
| C(17)-H(29)      | 0.9800    |
| C(28)-H(30)      | 0.9900    |
| C(28)-H(31)      | 0.9900    |
| C(6)-H(32)       | 0.9800    |
| C(6)-H(33)       | 0.9800    |
| C(6)-H(34)       | 0.9800    |
| C(7)-H(9)        | 0.9500    |
| O(3)-C(31)       | 1.249(8)  |
| C(31)-O(4)       | 1.164(13) |
| <br>             |           |
| C(5)-O(1)-C(12)  | 117.6(2)  |
| C(2)-O(2)-C(8)   | 116.5(2)  |
| C(23)-N(2)-C(22) | 110.9(3)  |

|                     |          |
|---------------------|----------|
| C(23)-N(2)-H(1)     | 124.5    |
| C(22)-N(2)-H(1)     | 124.5    |
| C(18)-N(1)-C(19)    | 111.4(3) |
| C(18)-N(1)-H(2)     | 124.3    |
| C(19)-N(1)-H(2)     | 124.3    |
| C(25)-C(22)-N(2)    | 106.4(3) |
| C(25)-C(22)-C(27)#1 | 131.1(3) |
| N(2)-C(22)-C(27)#1  | 122.0(3) |
| C(23)-C(16)-C(18)   | 112.2(2) |
| C(23)-C(16)-C(17)   | 109.3(2) |
| C(18)-C(16)-C(17)   | 109.3(2) |
| C(23)-C(16)-C(14)   | 106.9(2) |
| C(18)-C(16)-C(14)   | 109.2(2) |
| C(17)-C(16)-C(14)   | 109.9(2) |
| C(5)-C(1)-C(3)      | 120.7(3) |
| C(5)-C(1)-H(3)      | 119.7    |
| C(3)-C(1)-H(3)      | 119.7    |
| O(1)-C(12)-C(13)    | 112.8(2) |
| O(1)-C(12)-H(10)    | 109.0    |
| C(13)-C(12)-H(10)   | 109.0    |
| O(1)-C(12)-H(11)    | 109.0    |
| C(13)-C(12)-H(11)   | 109.0    |
| H(10)-C(12)-H(11)   | 107.8    |
| C(24)-C(23)-N(2)    | 106.2(3) |
| C(24)-C(23)-C(16)   | 131.1(3) |
| N(2)-C(23)-C(16)    | 122.4(3) |
| C(12)-C(13)-C(15)   | 113.2(2) |
| C(12)-C(13)-H(12)   | 108.9    |
| C(15)-C(13)-H(12)   | 108.9    |
| C(12)-C(13)-H(13)   | 108.9    |
| C(15)-C(13)-H(13)   | 108.9    |
| H(12)-C(13)-H(13)   | 107.8    |
| O(2)-C(2)-C(7)      | 122.3(3) |
| O(2)-C(2)-C(4)      | 117.0(3) |
| C(7)-C(2)-C(4)      | 120.7(3) |
| C(21)-C(18)-N(1)    | 106.2(3) |
| C(21)-C(18)-C(16)   | 131.2(3) |
| N(1)-C(18)-C(16)    | 122.4(3) |
| C(15)-C(14)-C(16)   | 117.1(2) |

|                     |          |
|---------------------|----------|
| C(15)-C(14)-H(14)   | 108.0    |
| C(16)-C(14)-H(14)   | 108.0    |
| C(15)-C(14)-H(15)   | 108.0    |
| C(16)-C(14)-H(15)   | 108.0    |
| H(14)-C(14)-H(15)   | 107.3    |
| C(20)-C(19)-N(1)    | 105.4(3) |
| C(20)-C(19)-C(27)   | 132.0(3) |
| N(1)-C(19)-C(27)    | 122.6(3) |
| C(14)-C(15)-C(13)   | 109.7(2) |
| C(14)-C(15)-H(16)   | 109.7    |
| C(13)-C(15)-H(16)   | 109.7    |
| C(14)-C(15)-H(17)   | 109.7    |
| C(13)-C(15)-H(17)   | 109.7    |
| H(16)-C(15)-H(17)   | 108.2    |
| C(1)-C(3)-C(4)      | 119.0(3) |
| C(1)-C(3)-C(6)      | 120.2(3) |
| C(4)-C(3)-C(6)      | 120.8(3) |
| C(2)-C(4)-C(3)      | 120.3(3) |
| C(2)-C(4)-H(4)      | 119.8    |
| C(3)-C(4)-H(4)      | 119.8    |
| C(27)-C(26)-H(18)   | 109.5    |
| C(27)-C(26)-H(19)   | 109.5    |
| H(18)-C(26)-H(19)   | 109.5    |
| C(27)-C(26)-H(20)   | 109.5    |
| H(18)-C(26)-H(20)   | 109.5    |
| H(19)-C(26)-H(20)   | 109.5    |
| O(2)-C(8)-C(9)      | 109.3(2) |
| O(2)-C(8)-H(21)     | 109.8    |
| C(9)-C(8)-H(21)     | 109.8    |
| O(2)-C(8)-H(22)     | 109.8    |
| C(9)-C(8)-H(22)     | 109.8    |
| H(21)-C(8)-H(22)    | 108.3    |
| C(19)-C(27)-C(22)#1 | 111.3(2) |
| C(19)-C(27)-C(26)   | 109.4(3) |
| C(22)#1-C(27)-C(26) | 107.4(2) |
| C(19)-C(27)-C(28)   | 110.5(3) |
| C(22)#1-C(27)-C(28) | 108.8(2) |
| C(26)-C(27)-C(28)   | 109.4(2) |
| C(19)-C(20)-C(21)   | 108.6(3) |

|                   |          |
|-------------------|----------|
| C(19)-C(20)-H(5)  | 125.7    |
| C(21)-C(20)-H(5)  | 125.7    |
| C(8)-C(9)-C(10)   | 110.3(2) |
| C(8)-C(9)-H(23)   | 109.6    |
| C(10)-C(9)-H(23)  | 109.6    |
| C(8)-C(9)-H(24)   | 109.6    |
| C(10)-C(9)-H(24)  | 109.6    |
| H(23)-C(9)-H(24)  | 108.1    |
| C(28)-C(10)-C(9)  | 113.7(3) |
| C(28)-C(10)-H(25) | 108.8    |
| C(9)-C(10)-H(25)  | 108.8    |
| C(28)-C(10)-H(26) | 108.8    |
| C(9)-C(10)-H(26)  | 108.8    |
| H(25)-C(10)-H(26) | 107.7    |
| C(23)-C(24)-C(25) | 108.7(3) |
| C(23)-C(24)-H(6)  | 125.6    |
| C(25)-C(24)-H(6)  | 125.6    |
| C(18)-C(21)-C(20) | 108.4(3) |
| C(18)-C(21)-H(7)  | 125.8    |
| C(20)-C(21)-H(7)  | 125.8    |
| O(1)-C(5)-C(1)    | 116.4(3) |
| O(1)-C(5)-C(7)    | 123.3(3) |
| C(1)-C(5)-C(7)    | 120.3(3) |
| C(22)-C(25)-C(24) | 107.7(3) |
| C(22)-C(25)-H(8)  | 126.1    |
| C(24)-C(25)-H(8)  | 126.1    |
| C(16)-C(17)-H(27) | 109.5    |
| C(16)-C(17)-H(28) | 109.5    |
| H(27)-C(17)-H(28) | 109.5    |
| C(16)-C(17)-H(29) | 109.5    |
| H(27)-C(17)-H(29) | 109.5    |
| H(28)-C(17)-H(29) | 109.5    |
| C(10)-C(28)-C(27) | 114.9(2) |
| C(10)-C(28)-H(30) | 108.6    |
| C(27)-C(28)-H(30) | 108.6    |
| C(10)-C(28)-H(31) | 108.6    |
| C(27)-C(28)-H(31) | 108.6    |
| H(30)-C(28)-H(31) | 107.5    |
| C(3)-C(6)-H(32)   | 109.5    |

|                  |            |
|------------------|------------|
| C(3)-C(6)-H(33)  | 109.5      |
| H(32)-C(6)-H(33) | 109.5      |
| C(3)-C(6)-H(34)  | 109.5      |
| H(32)-C(6)-H(34) | 109.5      |
| H(33)-C(6)-H(34) | 109.5      |
| C(2)-C(7)-C(5)   | 119.0(3)   |
| C(2)-C(7)-H(9)   | 120.5      |
| C(5)-C(7)-H(9)   | 120.5      |
| O(4)-C(31)-O(3)  | 180.000(2) |

---

Symmetry transformations used to generate equivalent atoms:

#1 -x+3/2,-y+1/2,z

Table 4. Anisotropic displacement parameters ( $\text{\AA}^2 \times 10^3$ ) for compound **1**. The anisotropic displacement factor exponent takes the form:  $-2\pi^2 [h^2 a^{*2} U^{11} + \dots + 2 h k a^* b^* U^{12}]$

|       | U <sup>11</sup> | U <sup>22</sup> | U <sup>33</sup> | U <sup>23</sup> | U <sup>13</sup> | U <sup>12</sup> |
|-------|-----------------|-----------------|-----------------|-----------------|-----------------|-----------------|
| O(1)  | 59(1)           | 57(1)           | 83(1)           | 6(1)            | 7(1)            | 1(1)            |
| O(2)  | 68(1)           | 60(1)           | 78(1)           | 5(1)            | 6(1)            | 5(1)            |
| N(2)  | 57(2)           | 70(2)           | 78(2)           | -11(1)          | 2(1)            | -9(1)           |
| N(1)  | 62(2)           | 61(2)           | 69(2)           | -1(1)           | -4(1)           | -4(1)           |
| C(22) | 57(2)           | 60(2)           | 80(2)           | -6(2)           | 1(2)            | -10(2)          |
| C(16) | 56(2)           | 57(2)           | 73(2)           | 0(2)            | 0(1)            | -2(1)           |
| C(1)  | 53(2)           | 65(2)           | 76(2)           | -3(2)           | 2(1)            | -1(1)           |
| C(12) | 61(2)           | 63(2)           | 75(2)           | 4(2)            | 6(2)            | 1(2)            |
| C(23) | 52(2)           | 63(2)           | 74(2)           | -2(2)           | 4(1)            | -5(1)           |
| C(13) | 54(2)           | 55(2)           | 75(2)           | -2(1)           | 3(1)            | 2(1)            |
| C(2)  | 62(2)           | 56(2)           | 71(2)           | 0(2)            | -2(2)           | 0(2)            |
| C(18) | 53(2)           | 55(2)           | 75(2)           | 0(2)            | 1(1)            | -3(1)           |
| C(14) | 58(2)           | 56(2)           | 78(2)           | -5(2)           | 3(2)            | -3(1)           |
| C(19) | 61(2)           | 53(2)           | 73(2)           | 1(2)            | 2(2)            | -5(1)           |
| C(15) | 58(2)           | 62(2)           | 75(2)           | -3(2)           | 2(2)            | -3(1)           |
| C(3)  | 59(2)           | 71(2)           | 69(2)           | -1(2)           | -2(2)           | -7(2)           |
| C(4)  | 64(2)           | 65(2)           | 68(2)           | 5(2)            | -3(2)           | -6(2)           |
| C(26) | 67(2)           | 64(2)           | 83(2)           | -6(2)           | 4(2)            | -5(2)           |
| C(8)  | 66(2)           | 59(2)           | 71(2)           | 4(2)            | 5(2)            | -2(2)           |
| C(27) | 56(2)           | 61(2)           | 77(2)           | 1(2)            | -2(2)           | -6(1)           |
| C(20) | 69(2)           | 59(2)           | 68(2)           | -3(2)           | 1(2)            | -2(2)           |
| C(9)  | 60(2)           | 60(2)           | 81(2)           | 0(2)            | 1(2)            | -6(2)           |
| C(10) | 60(2)           | 57(2)           | 80(2)           | 1(2)            | 3(2)            | -7(1)           |
| C(24) | 59(2)           | 75(2)           | 80(2)           | -5(2)           | 8(2)            | -9(2)           |
| C(21) | 63(2)           | 69(2)           | 70(2)           | -3(2)           | -4(2)           | 1(2)            |
| C(5)  | 59(2)           | 55(2)           | 76(2)           | 2(2)            | -1(2)           | -7(2)           |
| C(25) | 65(2)           | 74(2)           | 74(2)           | -7(2)           | -1(2)           | -14(2)          |
| C(17) | 70(2)           | 64(2)           | 78(2)           | 4(2)            | 3(2)            | -6(2)           |
| C(28) | 60(2)           | 60(2)           | 78(2)           | 6(2)            | 0(2)            | -6(1)           |
| C(6)  | 63(2)           | 97(3)           | 77(2)           | 12(2)           | 4(2)            | -6(2)           |
| C(7)  | 57(2)           | 59(2)           | 73(2)           | -2(2)           | 3(2)            | -1(2)           |
| O(3)  | 157(5)          | 152(6)          | 70(4)           | 0               | 0               | 71(4)           |
| C(31) | 136(6)          | 143(6)          | 85(5)           | 0               | 0               | -1(5)           |
| O(4)  | 140(13)         | 140(14)         | 62(10)          | 0               | 0               | 52(10)          |





Table 5. Hydrogen coordinates ( $\times 10^4$ ) and isotropic displacement parameters ( $\text{\AA}^2 \times 10^{-3}$ ) for compound **1**.

|       | x    | y     | z    | U(eq) |
|-------|------|-------|------|-------|
| H(1)  | 7375 | 4310  | 2921 | 82    |
| H(2)  | 6943 | 2011  | 4264 | 77    |
| H(3)  | 4505 | 2608  | 6680 | 77    |
| H(10) | 5064 | 4098  | 3988 | 79    |
| H(11) | 5204 | 2622  | 4093 | 79    |
| H(12) | 5680 | 3419  | 5284 | 73    |
| H(13) | 5572 | 4848  | 4909 | 73    |
| H(14) | 6347 | 3750  | 4791 | 77    |
| H(15) | 6246 | 5175  | 4406 | 77    |
| H(16) | 5892 | 2862  | 3664 | 78    |
| H(17) | 5787 | 4301  | 3294 | 78    |
| H(4)  | 5009 | -835  | 7340 | 79    |
| H(18) | 6757 | -1830 | 2684 | 107   |
| H(19) | 7118 | -2446 | 3266 | 107   |
| H(20) | 7191 | -1402 | 2411 | 107   |
| H(21) | 6006 | 178   | 5491 | 78    |
| H(22) | 5692 | -379  | 4724 | 78    |
| H(5)  | 6569 | 145   | 1910 | 78    |
| H(23) | 5902 | -2530 | 5093 | 80    |
| H(24) | 6225 | -1946 | 5822 | 80    |
| H(25) | 6407 | -2480 | 4044 | 79    |
| H(26) | 6229 | -1075 | 3824 | 79    |
| H(6)  | 6814 | 5492  | 5290 | 85    |
| H(7)  | 6382 | 2510  | 1764 | 81    |
| H(8)  | 7515 | 6181  | 5443 | 85    |
| H(27) | 6476 | 5918  | 2749 | 106   |
| H(28) | 6278 | 4697  | 2217 | 106   |
| H(29) | 6731 | 4978  | 2069 | 106   |
| H(30) | 6892 | -1623 | 5009 | 79    |
| H(31) | 6687 | -229  | 5037 | 79    |
| H(32) | 4370 | 1324  | 8312 | 119   |
| H(33) | 4454 | -202  | 8237 | 119   |
| H(34) | 4143 | 459   | 7517 | 119   |

H(9)

5459

1421

5177

76

Table 6. Torsion angles [°] for compound **1**.

---

|                           |           |
|---------------------------|-----------|
| C(23)-N(2)-C(22)-C(25)    | -0.4(4)   |
| C(23)-N(2)-C(22)-C(27)#1  | -173.1(3) |
| C(5)-O(1)-C(12)-C(13)     | -80.6(3)  |
| C(22)-N(2)-C(23)-C(24)    | 0.2(4)    |
| C(22)-N(2)-C(23)-C(16)    | 175.0(3)  |
| C(18)-C(16)-C(23)-C(24)   | -130.6(4) |
| C(17)-C(16)-C(23)-C(24)   | 108.0(4)  |
| C(14)-C(16)-C(23)-C(24)   | -10.9(4)  |
| C(18)-C(16)-C(23)-N(2)    | 56.0(4)   |
| C(17)-C(16)-C(23)-N(2)    | -65.3(4)  |
| C(14)-C(16)-C(23)-N(2)    | 175.8(3)  |
| O(1)-C(12)-C(13)-C(15)    | 166.1(2)  |
| C(8)-O(2)-C(2)-C(7)       | -4.6(4)   |
| C(8)-O(2)-C(2)-C(4)       | 175.1(2)  |
| C(19)-N(1)-C(18)-C(21)    | 0.9(3)    |
| C(19)-N(1)-C(18)-C(16)    | 177.0(3)  |
| C(23)-C(16)-C(18)-C(21)   | -143.8(3) |
| C(17)-C(16)-C(18)-C(21)   | -22.3(4)  |
| C(14)-C(16)-C(18)-C(21)   | 97.9(4)   |
| C(23)-C(16)-C(18)-N(1)    | 41.2(4)   |
| C(17)-C(16)-C(18)-N(1)    | 162.7(3)  |
| C(14)-C(16)-C(18)-N(1)    | -77.1(3)  |
| C(23)-C(16)-C(14)-C(15)   | -179.7(3) |
| C(18)-C(16)-C(14)-C(15)   | -58.0(3)  |
| C(17)-C(16)-C(14)-C(15)   | 61.8(3)   |
| C(18)-N(1)-C(19)-C(20)    | -0.8(3)   |
| C(18)-N(1)-C(19)-C(27)    | -179.5(3) |
| C(16)-C(14)-C(15)-C(13)   | 179.1(2)  |
| C(12)-C(13)-C(15)-C(14)   | -179.5(3) |
| C(5)-C(1)-C(3)-C(4)       | 1.9(4)    |
| C(5)-C(1)-C(3)-C(6)       | -176.0(3) |
| O(2)-C(2)-C(4)-C(3)       | 179.3(3)  |
| C(7)-C(2)-C(4)-C(3)       | -1.0(4)   |
| C(1)-C(3)-C(4)-C(2)       | -0.6(4)   |
| C(6)-C(3)-C(4)-C(2)       | 177.4(3)  |
| C(2)-O(2)-C(8)-C(9)       | -169.7(2) |
| C(20)-C(19)-C(27)-C(22)#1 | 133.0(3)  |

|                           |           |
|---------------------------|-----------|
| N(1)-C(19)-C(27)-C(22)#1  | -48.8(4)  |
| C(20)-C(19)-C(27)-C(26)   | 14.5(4)   |
| N(1)-C(19)-C(27)-C(26)    | -167.3(3) |
| C(20)-C(19)-C(27)-C(28)   | -106.0(4) |
| N(1)-C(19)-C(27)-C(28)    | 72.3(3)   |
| N(1)-C(19)-C(20)-C(21)    | 0.4(3)    |
| C(27)-C(19)-C(20)-C(21)   | 178.9(3)  |
| O(2)-C(8)-C(9)-C(10)      | 177.6(2)  |
| C(8)-C(9)-C(10)-C(28)     | 87.6(3)   |
| N(2)-C(23)-C(24)-C(25)    | 0.1(4)    |
| C(16)-C(23)-C(24)-C(25)   | -174.1(3) |
| N(1)-C(18)-C(21)-C(20)    | -0.6(3)   |
| C(16)-C(18)-C(21)-C(20)   | -176.2(3) |
| C(19)-C(20)-C(21)-C(18)   | 0.1(3)    |
| C(12)-O(1)-C(5)-C(1)      | -171.4(2) |
| C(12)-O(1)-C(5)-C(7)      | 7.7(4)    |
| C(3)-C(1)-C(5)-O(1)       | 177.3(3)  |
| C(3)-C(1)-C(5)-C(7)       | -1.8(4)   |
| N(2)-C(22)-C(25)-C(24)    | 0.4(4)    |
| C(27)#1-C(22)-C(25)-C(24) | 172.2(3)  |
| C(23)-C(24)-C(25)-C(22)   | -0.3(4)   |
| C(9)-C(10)-C(28)-C(27)    | -167.5(3) |
| C(19)-C(27)-C(28)-C(10)   | 72.5(3)   |
| C(22)#1-C(27)-C(28)-C(10) | -165.0(3) |
| C(26)-C(27)-C(28)-C(10)   | -48.0(3)  |
| O(2)-C(2)-C(7)-C(5)       | -179.1(3) |
| C(4)-C(2)-C(7)-C(5)       | 1.2(4)    |
| O(1)-C(5)-C(7)-C(2)       | -178.8(3) |
| C(1)-C(5)-C(7)-C(2)       | 0.2(4)    |

---

Symmetry transformations used to generate equivalent atoms:

#1 -x+3/2,-y+1/2,z

PART 1 (methanol oxygen is hydrogen-bonded with two N(2)-H.)

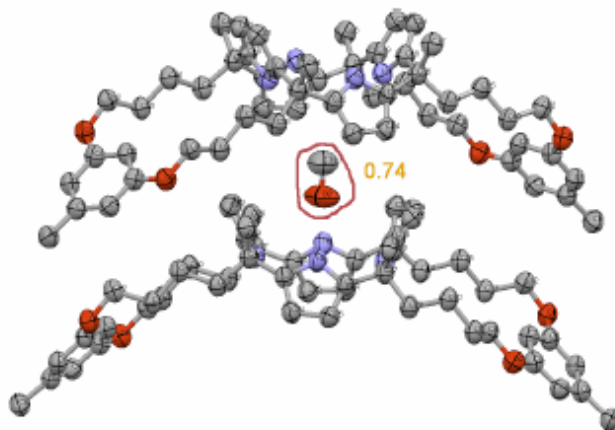

PART 2 (methanol oxygen is hydrogen-bonded with two N(1)-H.)

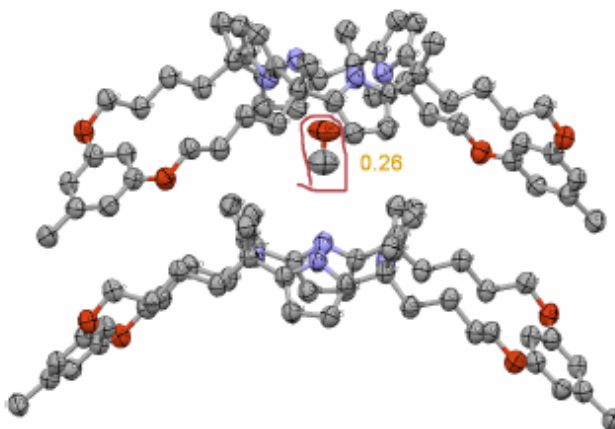

Total View (PART 1 + PART 2)

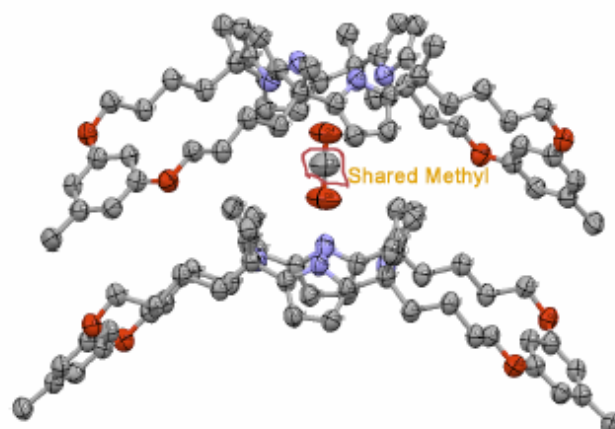

Table 1. Crystal data and structure refinement for compound **2**.

|                                   |                                                                                                                    |
|-----------------------------------|--------------------------------------------------------------------------------------------------------------------|
| Identification code               | 01130chl                                                                                                           |
| Empirical formula                 | C <sub>56</sub> H <sub>72</sub> Cl <sub>3</sub> N <sub>4</sub> O <sub>5</sub>                                      |
| Formula weight                    | 987.53                                                                                                             |
| Temperature                       | 93(2) K                                                                                                            |
| Wavelength                        | 1.54187 Å                                                                                                          |
| Crystal system                    | Triclinic                                                                                                          |
| Space group                       | P -1                                                                                                               |
| Unit cell dimensions              | a = 11.7904(6) Å    a = 72.935(3)°.<br>b = 12.5321(6) Å    b = 78.389(3)°.<br>c = 19.6483(10) Å    g = 68.038(3)°. |
| Volume                            | 2560.2(2) Å <sup>3</sup>                                                                                           |
| Z                                 | 2                                                                                                                  |
| Density (calculated)              | 1.281 Mg/m <sup>3</sup>                                                                                            |
| Absorption coefficient            | 2.032 mm <sup>-1</sup>                                                                                             |
| F(000)                            | 1054                                                                                                               |
| Crystal size                      | 0.20 x 0.20 x 0.05 mm <sup>3</sup>                                                                                 |
| Theta range for data collection   | 3.92 to 60.00°.                                                                                                    |
| Index ranges                      | -13 ≤ h ≤ 12, -14 ≤ k ≤ 14, -21 ≤ l ≤ 22                                                                           |
| Reflections collected             | 21173                                                                                                              |
| Independent reflections           | 7406 [R(int) = 0.1997]                                                                                             |
| Completeness to theta = 60.00°    | 97.4 %                                                                                                             |
| Absorption correction             | Semi-empirical from equivalents                                                                                    |
| Max. and min. transmission        | 0.9052 and 0.6867                                                                                                  |
| Refinement method                 | Full-matrix least-squares on F <sup>2</sup>                                                                        |
| Data / restraints / parameters    | 7406 / 1 / 621                                                                                                     |
| Goodness-of-fit on F <sup>2</sup> | 0.894                                                                                                              |
| Final R indices [I > 2σ(I)]       | R1 = 0.1251, wR2 = 0.2857                                                                                          |
| R indices (all data)              | R1 = 0.2272, wR2 = 0.3635                                                                                          |
| Largest diff. peak and hole       | 0.333 and -0.352 e.Å <sup>-3</sup>                                                                                 |

Table 2. Atomic coordinates ( $\times 10^4$ ) and equivalent isotropic displacement parameters ( $\text{\AA}^2 \times 10^3$ ) for compound **2**.  $U(\text{eq})$  is defined as one third of the trace of the orthogonalized  $U_{ij}$  tensor.

|       | x        | y        | z        | $U(\text{eq})$ |
|-------|----------|----------|----------|----------------|
| Cl(1) | -2428(3) | -155(2)  | 5519(2)  | 104(1)         |
| Cl(2) | -4853(3) | 1241(3)  | 5087(2)  | 125(1)         |
| O(1)  | 3331(6)  | 5519(5)  | -2895(3) | 80(2)          |
| O(2)  | -349(6)  | 1906(5)  | 2713(3)  | 77(2)          |
| O(3)  | 2653(6)  | 3570(5)  | 2562(3)  | 75(2)          |
| O(4)  | 311(6)   | 3701(5)  | -2814(4) | 84(2)          |
| C(1)  | 1817(9)  | 4579(7)  | -2794(5) | 72(3)          |
| N(1)  | 4414(7)  | 1906(6)  | 1592(4)  | 71(2)          |
| C(2)  | 183(9)   | 2359(8)  | 3060(5)  | 72(3)          |
| N(2)  | 1345(7)  | 162(6)   | 1680(4)  | 76(2)          |
| N(3)  | 2240(8)  | 2334(6)  | 504(4)   | 80(2)          |
| C(3)  | 1146(9)  | 2731(8)  | 2674(5)  | 74(3)          |
| C(4)  | 1705(9)  | 3229(7)  | 2995(6)  | 69(3)          |
| C(5)  | 627(9)   | 2623(8)  | -1573(5) | 75(3)          |
| C(6)  | 2721(10) | 4995(8)  | -3173(6) | 80(3)          |
| N(4)  | 3721(8)  | -453(7)  | 2658(4)  | 84(2)          |
| C(7)  | 3301(9)  | 4599(8)  | -863(5)  | 83(3)          |
| C(8)  | 2471(10) | 3308(8)  | 598(5)   | 75(3)          |
| C(9)  | 3708(9)  | 3408(7)  | 446(5)   | 71(3)          |
| C(10) | 2204(10) | -1505(8) | 2752(5)  | 80(3)          |
| C(11) | 823(8)   | 1503(7)  | -273(5)  | 74(3)          |
| C(12) | 1224(8)  | 344(8)   | 970(5)   | 72(3)          |
| C(13) | 1212(9)  | -764(8)  | 3236(5)  | 79(3)          |
| C(14) | 5195(9)  | 2174(8)  | 3022(5)  | 81(3)          |
| C(15) | 1637(10) | 4053(8)  | -3831(5) | 87(3)          |
| C(16) | 42(10)   | 3030(9)  | 4867(5)  | 92(3)          |
| C(17) | 419(10)  | 2934(8)  | 4089(6)  | 84(3)          |
| C(18) | -185(9)  | 2432(8)  | 3779(5)  | 80(3)          |
| C(19) | 4509(9)  | -2388(9) | 2993(5)  | 86(3)          |
| C(20) | 4631(10) | 2363(8)  | 861(6)   | 75(3)          |
| C(21) | 3447(10) | -1496(9) | 2802(5)  | 79(3)          |
| C(22) | -117(9)  | 3684(8)  | -2075(5) | 81(3)          |
| C(23) | 571(9)   | 1539(8)  | 541(5)   | 74(3)          |
| C(24) | 210(8)   | 2663(8)  | -808(5)  | 78(3)          |

|       |           |          |          |         |
|-------|-----------|----------|----------|---------|
| C(25) | 3304(9)   | 4076(8)  | 2845(5)  | 83(3)   |
| C(26) | 3650(9)   | 4525(7)  | 678(5)   | 84(3)   |
| C(27) | 3688(9)   | 4497(8)  | -1647(5) | 83(3)   |
| C(28) | 2990(10)  | 5614(8)  | -2168(5) | 93(3)   |
| C(29) | 3108(10)  | 4936(8)  | -3880(5) | 80(3)   |
| C(30) | 6807(8)   | -303(8)  | 2790(5)  | 86(3)   |
| C(31) | 5453(10)  | 954(9)   | 1828(6)  | 84(3)   |
| C(32) | -813(9)   | 1877(8)  | 775(5)   | 87(3)   |
| C(33) | 2233(10)  | -2823(7) | 3011(5)  | 90(3)   |
| C(34) | 1353(10)  | 4043(8)  | 789(5)   | 76(3)   |
| C(35) | 431(9)    | 3514(8)  | 811(5)   | 76(3)   |
| C(36) | 4892(10)  | -669(9)  | 2740(5)  | 83(3)   |
| C(37) | 5450(10)  | 282(8)   | 2617(5)  | 79(3)   |
| C(38) | 6330(9)   | 830(8)   | 1258(6)  | 78(3)   |
| C(39) | 1264(10)  | 4111(8)  | -3138(6) | 81(3)   |
| C(40) | -1007(10) | 294(9)   | 3578(5)  | 90(3)   |
| C(41) | 1337(9)   | 3329(8)  | 3697(6)  | 77(3)   |
| C(42) | 2117(9)   | -1607(9) | 1445(5)  | 82(3)   |
| C(43) | 5803(10)  | 1691(9)  | 652(6)   | 87(3)   |
| C(44) | 2993(10)  | 4445(9)  | -4986(5) | 100(3)  |
| C(45) | 1026(9)   | 2455(8)  | 635(5)   | 71(3)   |
| C(46) | 4259(9)   | 3207(9)  | 3328(5)  | 86(3)   |
| C(47) | 2575(10)  | 4464(8)  | -4221(6) | 82(3)   |
| C(48) | 4740(9)   | 1145(8)  | 3105(5)  | 81(3)   |
| C(49) | -114(9)   | -677(8)  | 3226(5)  | 83(3)   |
| C(50) | -3653(10) | 1191(9)  | 5502(6)  | 103(4)  |
| C(51) | 5456(10)  | -1890(8) | 2952(5)  | 85(3)   |
| C(52) | 1903(9)   | -1039(8) | 1975(6)  | 81(3)   |
| C(53) | 4130(10)  | 3553(8)  | -356(5)  | 89(3)   |
| C(54) | 1717(8)   | -729(8)  | 816(5)   | 75(3)   |
| C(55) | -1383(10) | 1530(8)  | 3061(5)  | 91(3)   |
| Cl(3) | -3125(3)  | 2410(2)  | 4976(2)  | 116(1)  |
| C(56) | 5428(17)  | 562(17)  | -933(7)  | 158(6)  |
| O(6)  | 4298(14)  | 751(15)  | -450(14) | 450(20) |

---



Table 3. Bond lengths [Å] and angles [°] for compound 2.

---

|             |           |
|-------------|-----------|
| Cl(1)-C(50) | 1.759(10) |
| Cl(2)-C(50) | 1.743(11) |
| O(1)-C(6)   | 1.403(11) |
| O(1)-C(28)  | 1.431(10) |
| O(2)-C(2)   | 1.359(10) |
| O(2)-C(55)  | 1.443(10) |
| O(3)-C(4)   | 1.385(10) |
| O(3)-C(25)  | 1.429(10) |
| O(4)-C(39)  | 1.372(11) |
| O(4)-C(22)  | 1.436(10) |
| C(1)-C(6)   | 1.353(13) |
| C(1)-C(39)  | 1.386(12) |
| C(1)-H(1)   | 0.9500    |
| N(1)-C(20)  | 1.391(11) |
| N(1)-C(31)  | 1.397(11) |
| N(1)-H(65)  | 0.8800    |
| C(2)-C(3)   | 1.387(12) |
| C(2)-C(18)  | 1.412(12) |
| N(2)-C(12)  | 1.373(10) |
| N(2)-C(52)  | 1.392(11) |
| N(2)-H(66)  | 0.8800    |
| N(3)-C(45)  | 1.360(11) |
| N(3)-C(8)   | 1.413(10) |
| N(3)-H(67)  | 0.8800    |
| C(3)-C(4)   | 1.389(12) |
| C(3)-H(2)   | 0.9500    |
| C(4)-C(41)  | 1.387(12) |
| C(5)-C(22)  | 1.488(11) |
| C(5)-C(24)  | 1.495(11) |
| C(5)-H(3)   | 0.9900    |
| C(5)-H(4)   | 0.9900    |
| C(6)-C(29)  | 1.386(12) |
| N(4)-C(36)  | 1.338(11) |
| N(4)-C(21)  | 1.398(11) |
| N(4)-H(68)  | 0.8800    |
| C(7)-C(53)  | 1.528(12) |
| C(7)-C(27)  | 1.545(12) |

|             |           |
|-------------|-----------|
| C(7)-H(5)   | 0.9900    |
| C(7)-H(6)   | 0.9900    |
| C(8)-C(34)  | 1.351(12) |
| C(8)-C(9)   | 1.473(12) |
| C(9)-C(20)  | 1.494(12) |
| C(9)-C(53)  | 1.532(12) |
| C(9)-C(26)  | 1.569(11) |
| C(10)-C(21) | 1.492(13) |
| C(10)-C(52) | 1.528(13) |
| C(10)-C(13) | 1.548(12) |
| C(10)-C(33) | 1.569(11) |
| C(11)-C(24) | 1.537(11) |
| C(11)-C(23) | 1.579(12) |
| C(11)-H(7)  | 0.9900    |
| C(11)-H(8)  | 0.9900    |
| C(12)-C(54) | 1.350(11) |
| C(12)-C(23) | 1.485(12) |
| C(13)-C(49) | 1.531(12) |
| C(13)-H(9)  | 0.9900    |
| C(13)-H(10) | 0.9900    |
| C(14)-C(48) | 1.528(12) |
| C(14)-C(46) | 1.543(12) |
| C(14)-H(11) | 0.9900    |
| C(14)-H(12) | 0.9900    |
| C(15)-C(39) | 1.359(12) |
| C(15)-C(47) | 1.388(13) |
| C(15)-H(13) | 0.9500    |
| C(16)-C(17) | 1.532(12) |
| C(16)-H(14) | 0.9800    |
| C(16)-H(15) | 0.9800    |
| C(16)-H(16) | 0.9800    |
| C(17)-C(41) | 1.360(12) |
| C(17)-C(18) | 1.418(12) |
| C(18)-H(17) | 0.9500    |
| C(19)-C(21) | 1.362(13) |
| C(19)-C(51) | 1.448(13) |
| C(19)-H(18) | 0.9500    |
| C(20)-C(43) | 1.375(13) |
| C(22)-H(19) | 0.9900    |

|             |           |
|-------------|-----------|
| C(22)-H(20) | 0.9900    |
| C(23)-C(45) | 1.505(12) |
| C(23)-C(32) | 1.532(12) |
| C(24)-H(21) | 0.9900    |
| C(24)-H(22) | 0.9900    |
| C(25)-C(46) | 1.504(12) |
| C(25)-H(23) | 0.9900    |
| C(25)-H(24) | 0.9900    |
| C(26)-H(25) | 0.9800    |
| C(26)-H(26) | 0.9800    |
| C(26)-H(27) | 0.9800    |
| C(27)-C(28) | 1.524(12) |
| C(27)-H(28) | 0.9900    |
| C(27)-H(29) | 0.9900    |
| C(28)-H(30) | 0.9900    |
| C(28)-H(31) | 0.9900    |
| C(29)-C(47) | 1.370(12) |
| C(29)-H(32) | 0.9500    |
| C(30)-C(37) | 1.551(12) |
| C(30)-H(33) | 0.9800    |
| C(30)-H(34) | 0.9800    |
| C(30)-H(35) | 0.9800    |
| C(31)-C(38) | 1.365(12) |
| C(31)-C(37) | 1.533(13) |
| C(32)-H(36) | 0.9800    |
| C(32)-H(37) | 0.9800    |
| C(32)-H(38) | 0.9800    |
| C(33)-H(39) | 0.9800    |
| C(33)-H(40) | 0.9800    |
| C(33)-H(41) | 0.9800    |
| C(34)-C(35) | 1.458(12) |
| C(34)-H(42) | 0.9500    |
| C(35)-C(45) | 1.360(11) |
| C(35)-H(43) | 0.9500    |
| C(36)-C(51) | 1.391(12) |
| C(36)-C(37) | 1.505(12) |
| C(37)-C(48) | 1.549(12) |
| C(38)-C(43) | 1.418(12) |
| C(38)-H(44) | 0.9500    |

|                  |           |
|------------------|-----------|
| C(40)-C(49)      | 1.520(12) |
| C(40)-C(55)      | 1.540(13) |
| C(40)-H(45)      | 0.9900    |
| C(40)-H(46)      | 0.9900    |
| C(41)-H(47)      | 0.9500    |
| C(42)-C(52)      | 1.359(12) |
| C(42)-C(54)      | 1.417(12) |
| C(42)-H(48)      | 0.9500    |
| C(43)-H(49)      | 0.9500    |
| C(44)-C(47)      | 1.489(12) |
| C(44)-H(50)      | 0.9800    |
| C(44)-H(51)      | 0.9800    |
| C(44)-H(52)      | 0.9800    |
| C(46)-H(53)      | 0.9900    |
| C(46)-H(54)      | 0.9900    |
| C(48)-H(55)      | 0.9900    |
| C(48)-H(56)      | 0.9900    |
| C(49)-H(57)      | 0.9900    |
| C(49)-H(58)      | 0.9900    |
| C(50)-Cl(3)      | 1.821(11) |
| C(51)-H(59)      | 0.9500    |
| C(53)-H(60)      | 0.9900    |
| C(53)-H(61)      | 0.9900    |
| C(54)-H(62)      | 0.9500    |
| C(55)-H(63)      | 0.9900    |
| C(55)-H(64)      | 0.9900    |
| C(56)-O(6)       | 1.456(10) |
| C(56)-H(69)      | 0.9800    |
| C(56)-H(70)      | 0.9800    |
| C(56)-H(71)      | 0.9800    |
| O(6)-H(72)       | 0.8400    |
|                  |           |
| C(6)-O(1)-C(28)  | 118.5(8)  |
| C(2)-O(2)-C(55)  | 120.6(8)  |
| C(4)-O(3)-C(25)  | 118.7(7)  |
| C(39)-O(4)-C(22) | 120.2(8)  |
| C(6)-C(1)-C(39)  | 118.1(10) |
| C(6)-C(1)-H(1)   | 121.0     |
| C(39)-C(1)-H(1)  | 121.0     |

C(20)-N(1)-C(31) 109.1(8)  
C(20)-N(1)-H(65) 125.4  
C(31)-N(1)-H(65) 125.4  
O(2)-C(2)-C(3) 116.4(9)  
O(2)-C(2)-C(18) 123.0(9)  
C(3)-C(2)-C(18) 120.6(10)  
C(12)-N(2)-C(52) 110.1(8)  
C(12)-N(2)-H(66) 125.0  
C(52)-N(2)-H(66) 125.0  
C(45)-N(3)-C(8) 112.4(8)  
C(45)-N(3)-H(67) 123.8  
C(8)-N(3)-H(67) 123.8  
C(2)-C(3)-C(4) 118.9(10)  
C(2)-C(3)-H(2) 120.5  
C(4)-C(3)-H(2) 120.5  
O(3)-C(4)-C(41) 124.8(9)  
O(3)-C(4)-C(3) 114.1(9)  
C(41)-C(4)-C(3) 121.1(9)  
C(22)-C(5)-C(24) 112.2(8)  
C(22)-C(5)-H(3) 109.2  
C(24)-C(5)-H(3) 109.2  
C(22)-C(5)-H(4) 109.2  
C(24)-C(5)-H(4) 109.2  
H(3)-C(5)-H(4) 107.9  
C(1)-C(6)-C(29) 121.4(11)  
C(1)-C(6)-O(1) 123.7(10)  
C(29)-C(6)-O(1) 114.9(10)  
C(36)-N(4)-C(21) 112.2(9)  
C(36)-N(4)-H(68) 123.9  
C(21)-N(4)-H(68) 123.9  
C(53)-C(7)-C(27) 111.1(8)  
C(53)-C(7)-H(5) 109.4  
C(27)-C(7)-H(5) 109.4  
C(53)-C(7)-H(6) 109.4  
C(27)-C(7)-H(6) 109.4  
H(5)-C(7)-H(6) 108.0  
C(34)-C(8)-N(3) 104.7(9)  
C(34)-C(8)-C(9) 132.9(9)  
N(3)-C(8)-C(9) 122.2(9)

C(8)-C(9)-C(20) 112.3(8)  
C(8)-C(9)-C(53) 110.1(8)  
C(20)-C(9)-C(53) 109.5(8)  
C(8)-C(9)-C(26) 108.5(8)  
C(20)-C(9)-C(26) 107.0(8)  
C(53)-C(9)-C(26) 109.4(7)  
C(21)-C(10)-C(52) 110.3(8)  
C(21)-C(10)-C(13) 110.7(8)  
C(52)-C(10)-C(13) 110.7(8)  
C(21)-C(10)-C(33) 107.9(9)  
C(52)-C(10)-C(33) 108.1(7)  
C(13)-C(10)-C(33) 109.0(8)  
C(24)-C(11)-C(23) 116.2(7)  
C(24)-C(11)-H(7) 108.2  
C(23)-C(11)-H(7) 108.2  
C(24)-C(11)-H(8) 108.2  
C(23)-C(11)-H(8) 108.2  
H(7)-C(11)-H(8) 107.4  
C(54)-C(12)-N(2) 106.6(8)  
C(54)-C(12)-C(23) 132.2(9)  
N(2)-C(12)-C(23) 121.1(8)  
C(49)-C(13)-C(10) 116.3(8)  
C(49)-C(13)-H(9) 108.2  
C(10)-C(13)-H(9) 108.2  
C(49)-C(13)-H(10) 108.2  
C(10)-C(13)-H(10) 108.2  
H(9)-C(13)-H(10) 107.4  
C(48)-C(14)-C(46) 114.4(8)  
C(48)-C(14)-H(11) 108.7  
C(46)-C(14)-H(11) 108.7  
C(48)-C(14)-H(12) 108.7  
C(46)-C(14)-H(12) 108.7  
H(11)-C(14)-H(12) 107.6  
C(39)-C(15)-C(47) 121.6(11)  
C(39)-C(15)-H(13) 119.2  
C(47)-C(15)-H(13) 119.2  
C(17)-C(16)-H(14) 109.5  
C(17)-C(16)-H(15) 109.5  
H(14)-C(16)-H(15) 109.5

C(17)-C(16)-H(16) 109.5  
H(14)-C(16)-H(16) 109.5  
H(15)-C(16)-H(16) 109.5  
C(41)-C(17)-C(18) 120.2(10)  
C(41)-C(17)-C(16) 119.8(10)  
C(18)-C(17)-C(16) 120.0(10)  
C(2)-C(18)-C(17) 118.5(10)  
C(2)-C(18)-H(17) 120.7  
C(17)-C(18)-H(17) 120.7  
C(21)-C(19)-C(51) 109.4(9)  
C(21)-C(19)-H(18) 125.3  
C(51)-C(19)-H(18) 125.3  
C(43)-C(20)-N(1) 106.5(9)  
C(43)-C(20)-C(9) 130.9(10)  
N(1)-C(20)-C(9) 122.6(9)  
C(19)-C(21)-N(4) 105.1(9)  
C(19)-C(21)-C(10) 131.8(10)  
N(4)-C(21)-C(10) 123.0(9)  
O(4)-C(22)-C(5) 113.3(8)  
O(4)-C(22)-H(19) 108.9  
C(5)-C(22)-H(19) 108.9  
O(4)-C(22)-H(20) 108.9  
C(5)-C(22)-H(20) 108.9  
H(19)-C(22)-H(20) 107.7  
C(12)-C(23)-C(45) 110.9(8)  
C(12)-C(23)-C(32) 109.8(8)  
C(45)-C(23)-C(32) 109.1(8)  
C(12)-C(23)-C(11) 108.3(8)  
C(45)-C(23)-C(11) 109.0(7)  
C(32)-C(23)-C(11) 109.7(8)  
C(5)-C(24)-C(11) 113.6(7)  
C(5)-C(24)-H(21) 108.8  
C(11)-C(24)-H(21) 108.8  
C(5)-C(24)-H(22) 108.8  
C(11)-C(24)-H(22) 108.8  
H(21)-C(24)-H(22) 107.7  
O(3)-C(25)-C(46) 115.6(7)  
O(3)-C(25)-H(23) 108.4  
C(46)-C(25)-H(23) 108.4

O(3)-C(25)-H(24) 108.4  
C(46)-C(25)-H(24) 108.4  
H(23)-C(25)-H(24) 107.4  
C(9)-C(26)-H(25) 109.5  
C(9)-C(26)-H(26) 109.5  
H(25)-C(26)-H(26) 109.5  
C(9)-C(26)-H(27) 109.5  
H(25)-C(26)-H(27) 109.5  
H(26)-C(26)-H(27) 109.5  
C(28)-C(27)-C(7) 111.6(8)  
C(28)-C(27)-H(28) 109.3  
C(7)-C(27)-H(28) 109.3  
C(28)-C(27)-H(29) 109.3  
C(7)-C(27)-H(29) 109.3  
H(28)-C(27)-H(29) 108.0  
O(1)-C(28)-C(27) 111.9(8)  
O(1)-C(28)-H(30) 109.2  
C(27)-C(28)-H(30) 109.2  
O(1)-C(28)-H(31) 109.2  
C(27)-C(28)-H(31) 109.2  
H(30)-C(28)-H(31) 107.9  
C(47)-C(29)-C(6) 120.9(11)  
C(47)-C(29)-H(32) 119.5  
C(6)-C(29)-H(32) 119.5  
C(37)-C(30)-H(33) 109.5  
C(37)-C(30)-H(34) 109.5  
H(33)-C(30)-H(34) 109.5  
C(37)-C(30)-H(35) 109.5  
H(33)-C(30)-H(35) 109.5  
H(34)-C(30)-H(35) 109.5  
C(38)-C(31)-N(1) 108.1(9)  
C(38)-C(31)-C(37) 132.2(10)  
N(1)-C(31)-C(37) 119.7(10)  
C(23)-C(32)-H(36) 109.5  
C(23)-C(32)-H(37) 109.5  
H(36)-C(32)-H(37) 109.5  
C(23)-C(32)-H(38) 109.5  
H(36)-C(32)-H(38) 109.5  
H(37)-C(32)-H(38) 109.5



C(10)-C(33)-H(39) 109.5  
C(10)-C(33)-H(40) 109.5  
H(39)-C(33)-H(40) 109.5  
C(10)-C(33)-H(41) 109.5  
H(39)-C(33)-H(41) 109.5  
H(40)-C(33)-H(41) 109.5  
C(8)-C(34)-C(35) 108.8(8)  
C(8)-C(34)-H(42) 125.6  
C(35)-C(34)-H(42) 125.6  
C(45)-C(35)-C(34) 107.6(8)  
C(45)-C(35)-H(43) 126.2  
C(34)-C(35)-H(43) 126.2  
N(4)-C(36)-C(51) 107.9(9)  
N(4)-C(36)-C(37) 124.0(9)  
C(51)-C(36)-C(37) 128.1(10)  
C(36)-C(37)-C(31) 109.8(8)  
C(36)-C(37)-C(48) 110.7(8)  
C(31)-C(37)-C(48) 110.6(8)  
C(36)-C(37)-C(30) 109.2(8)  
C(31)-C(37)-C(30) 107.5(8)  
C(48)-C(37)-C(30) 108.9(8)  
C(31)-C(38)-C(43) 107.1(9)  
C(31)-C(38)-H(44) 126.5  
C(43)-C(38)-H(44) 126.5  
C(15)-C(39)-O(4) 116.2(10)  
C(15)-C(39)-C(1) 120.8(10)  
O(4)-C(39)-C(1) 123.1(10)  
C(49)-C(40)-C(55) 113.8(8)  
C(49)-C(40)-H(45) 108.8  
C(55)-C(40)-H(45) 108.8  
C(49)-C(40)-H(46) 108.8  
C(55)-C(40)-H(46) 108.8  
H(45)-C(40)-H(46) 107.7  
C(17)-C(41)-C(4) 120.5(10)  
C(17)-C(41)-H(47) 119.7  
C(4)-C(41)-H(47) 119.7  
C(52)-C(42)-C(54) 107.3(9)  
C(52)-C(42)-H(48) 126.3  
C(54)-C(42)-H(48) 126.3

C(20)-C(43)-C(38) 109.2(9)  
C(20)-C(43)-H(49) 125.4  
C(38)-C(43)-H(49) 125.4  
C(47)-C(44)-H(50) 109.5  
C(47)-C(44)-H(51) 109.5  
H(50)-C(44)-H(51) 109.5  
C(47)-C(44)-H(52) 109.5  
H(50)-C(44)-H(52) 109.5  
H(51)-C(44)-H(52) 109.5  
C(35)-C(45)-N(3) 106.4(8)  
C(35)-C(45)-C(23) 132.2(9)  
N(3)-C(45)-C(23) 121.2(8)  
C(25)-C(46)-C(14) 115.3(8)  
C(25)-C(46)-H(53) 108.4  
C(14)-C(46)-H(53) 108.4  
C(25)-C(46)-H(54) 108.4  
C(14)-C(46)-H(54) 108.4  
H(53)-C(46)-H(54) 107.5  
C(29)-C(47)-C(15) 117.2(11)  
C(29)-C(47)-C(44) 119.3(10)  
C(15)-C(47)-C(44) 123.5(11)  
C(14)-C(48)-C(37) 116.2(8)  
C(14)-C(48)-H(55) 108.2  
C(37)-C(48)-H(55) 108.2  
C(14)-C(48)-H(56) 108.2  
C(37)-C(48)-H(56) 108.2  
H(55)-C(48)-H(56) 107.4  
C(40)-C(49)-C(13) 110.4(8)  
C(40)-C(49)-H(57) 109.6  
C(13)-C(49)-H(57) 109.6  
C(40)-C(49)-H(58) 109.6  
C(13)-C(49)-H(58) 109.6  
H(57)-C(49)-H(58) 108.1  
Cl(2)-C(50)-Cl(1) 110.8(6)  
Cl(2)-C(50)-Cl(3) 107.0(6)  
Cl(1)-C(50)-Cl(3) 109.1(6)  
C(36)-C(51)-C(19) 105.4(9)  
C(36)-C(51)-H(59) 127.3  
C(19)-C(51)-H(59) 127.3

C(42)-C(52)-N(2) 106.8(9)  
C(42)-C(52)-C(10) 131.3(9)  
N(2)-C(52)-C(10) 121.9(9)  
C(7)-C(53)-C(9) 116.6(8)  
C(7)-C(53)-H(60) 108.1  
C(9)-C(53)-H(60) 108.1  
C(7)-C(53)-H(61) 108.1  
C(9)-C(53)-H(61) 108.1  
H(60)-C(53)-H(61) 107.3  
C(12)-C(54)-C(42) 109.2(9)  
C(12)-C(54)-H(62) 125.4  
C(42)-C(54)-H(62) 125.4  
O(2)-C(55)-C(40) 113.1(8)  
O(2)-C(55)-H(63) 109.0  
C(40)-C(55)-H(63) 109.0  
O(2)-C(55)-H(64) 109.0  
C(40)-C(55)-H(64) 109.0  
H(63)-C(55)-H(64) 107.8  
O(6)-C(56)-H(69) 109.5  
O(6)-C(56)-H(70) 109.5  
H(69)-C(56)-H(70) 109.5  
O(6)-C(56)-H(71) 109.5  
H(69)-C(56)-H(71) 109.5  
H(70)-C(56)-H(71) 109.5  
C(56)-O(6)-H(72) 109.5

---

Symmetry transformations used to generate equivalent atoms:

Table 4. Anisotropic displacement parameters ( $\text{\AA}^2 \times 10^3$ ) for compound **2**. The anisotropic displacement factor exponent takes the form:  $-2p^2 [h^2 a^* U_{11} + \dots + 2 h k a^* b^* U_{12}]$

|       | U11     | U22    | U33    | U23    | U13    | U12    |
|-------|---------|--------|--------|--------|--------|--------|
| Cl(1) | 108(2)  | 89(2)  | 108(2) | -23(2) | -13(2) | -25(2) |
| Cl(2) | 142(3)  | 112(2) | 137(3) | -10(2) | -55(2) | -53(2) |
| O(1)  | 86(5)   | 90(4)  | 70(4)  | -19(3) | -11(4) | -34(4) |
| O(2)  | 66(5)   | 93(4)  | 85(4)  | -23(3) | -17(4) | -36(4) |
| O(3)  | 77(5)   | 69(4)  | 85(4)  | -17(3) | -16(4) | -27(3) |
| O(4)  | 86(5)   | 82(4)  | 86(5)  | -14(3) | -14(4) | -34(4) |
| C(1)  | 78(8)   | 63(5)  | 80(7)  | -24(5) | -10(6) | -23(5) |
| N(1)  | 58(5)   | 77(5)  | 85(6)  | -33(4) | 3(4)   | -27(4) |
| C(2)  | 72(7)   | 72(6)  | 74(7)  | -11(5) | -26(6) | -21(5) |
| N(2)  | 80(6)   | 71(5)  | 76(6)  | -27(4) | -12(4) | -15(4) |
| N(3)  | 84(7)   | 69(5)  | 98(6)  | -36(4) | -11(5) | -23(4) |
| C(3)  | 68(7)   | 81(6)  | 79(7)  | -23(5) | -7(5)  | -28(5) |
| C(4)  | 65(7)   | 57(5)  | 87(7)  | -18(5) | -6(6)  | -21(5) |
| C(5)  | 71(7)   | 80(6)  | 80(7)  | -21(5) | -13(5) | -29(5) |
| C(6)  | 83(8)   | 64(6)  | 92(8)  | -19(5) | -25(7) | -15(5) |
| N(4)  | 74(6)   | 75(5)  | 106(6) | -17(4) | -12(5) | -32(4) |
| C(7)  | 74(7)   | 81(6)  | 90(8)  | -16(5) | 1(6)   | -28(5) |
| C(8)  | 78(8)   | 71(6)  | 91(7)  | -28(5) | -17(6) | -32(6) |
| C(9)  | 68(7)   | 69(6)  | 85(7)  | -22(5) | -15(6) | -25(5) |
| C(10) | 91(8)   | 72(6)  | 86(7)  | -19(5) | -14(6) | -34(6) |
| C(11) | 66(7)   | 63(5)  | 92(7)  | -27(5) | -13(5) | -12(5) |
| C(12) | 60(6)   | 66(6)  | 85(7)  | -13(5) | -20(5) | -13(5) |
| C(13) | 76(7)   | 85(6)  | 81(7)  | -15(5) | -12(6) | -34(6) |
| C(14) | 78(7)   | 80(6)  | 92(7)  | -21(5) | -12(6) | -31(6) |
| C(15) | 113(10) | 89(7)  | 63(7)  | -18(5) | -3(6)  | -41(7) |
| C(16) | 105(9)  | 104(7) | 72(7)  | -24(5) | 5(6)   | -44(7) |
| C(17) | 77(8)   | 80(6)  | 92(8)  | -21(5) | -22(6) | -16(6) |
| C(18) | 80(8)   | 78(6)  | 91(8)  | -14(5) | -26(6) | -35(5) |
| C(19) | 68(7)   | 92(7)  | 107(8) | -31(6) | -23(6) | -27(6) |
| C(20) | 71(7)   | 71(6)  | 93(8)  | -29(6) | -13(6) | -25(5) |
| C(21) | 65(7)   | 87(7)  | 97(7)  | -22(5) | -26(6) | -31(6) |
| C(22) | 78(7)   | 96(7)  | 75(7)  | -13(5) | -15(6) | -35(6) |
| C(23) | 53(6)   | 91(7)  | 76(7)  | -22(5) | -4(5)  | -22(5) |
| C(24) | 65(7)   | 80(6)  | 84(7)  | -16(5) | -8(5)  | -21(5) |

|       |         |         |          |         |          |                |
|-------|---------|---------|----------|---------|----------|----------------|
| C(25) | 84(8)   | 79(6)   | 93(7)    | -25(5)  | -8(6)    | -33(6)         |
| C(26) | 92(8)   | 75(6)   | 95(7)    | -24(5)  | -23(6)   | -29(6)         |
| C(27) | 68(7)   | 90(7)   | 100(8)   | -26(6)  | -2(6)    | -36(6)         |
| C(28) | 120(10) | 74(6)   | 90(8)    | -16(6)  | -21(7)   | -35(6)         |
| C(29) | 83(8)   | 82(7)   | 73(7)    | -15(5)  | -12(6)   | -26(6)         |
| C(30) | 64(7)   | 90(7)   | 113(8)   | -33(6)  | -17(6)   | -24(5)         |
| C(31) | 62(7)   | 85(7)   | 110(9)   | -39(6)  | -11(6)   | -17(6)         |
| C(32) | 77(8)   | 86(7)   | 104(8)   | -37(6)  | 1(6)     | -28(6)         |
| C(33) | 116(9)  | 56(5)   | 113(8)   | -17(5)  | -32(7)   | -39(5)         |
| C(34) | 82(8)   | 61(5)   | 87(7)    | -28(5)  | -11(6)   | -18(5)         |
| C(35) | 58(7)   | 84(7)   | 81(7)    | -23(5)  | -7(5)    | -14(5)         |
| C(36) | 57(7)   | 99(8)   | 101(8)   | -21(6)  | -16(6)   | -33(6)         |
| C(37) | 80(8)   | 78(6)   | 89(7)    | -20(5)  | -12(6)   | -36(6)         |
| C(38) | 51(6)   | 89(7)   | 98(8)    | -39(6)  | 5(6)     | -20(5)         |
| C(39) | 74(8)   | 67(6)   | 98(8)    | -19(6)  | -11(6)   | -19(5)         |
| C(40) | 84(8)   | 125(9)  | 84(7)    | -4(6)   | -24(6)   | -67(7)         |
| C(41) | 67(7)   | 77(6)   | 90(8)    | -24(5)  | -4(6)    | -27(5)         |
| C(42) | 88(8)   | 76(6)   | 93(8)    | -18(6)  | -32(6)   | -30(5)         |
| C(43) | 81(8)   | 94(7)   | 86(8)    | -10(6)  | -19(6)   | -34(6)         |
| C(44) | 110(9)  | 98(7)   | 88(8)    | -42(6)  | 0(7)     | -23(7)         |
| C(45) | 47(6)   | 80(6)   | 93(7)    | -36(5)  | -8(5)    | -16(5)         |
| C(46) | 68(7)   | 91(7)   | 109(8)   | -25(6)  | -15(6)   | -35(6)         |
| C(47) | 84(8)   | 70(6)   | 83(8)    | -18(5)  | -12(6)   | -13(5)         |
| C(48) | 83(8)   | 76(6)   | 87(7)    | -37(5)  | 1(6)     | -24(5)         |
| C(49) | 71(7)   | 83(7)   | 95(7)    | -23(6)  | 5(6)     | -34(6)         |
| C(50) | 76(8)   | 87(7)   | 152(10)  | -35(7)  | -29(7)   | -20(6)         |
| C(51) | 75(8)   | 75(6)   | 99(8)    | -22(5)  | -25(6)   | -9(5)          |
| C(52) | 85(8)   | 72(6)   | 97(8)    | -22(6)  | -18(6)   | -32(5)         |
| C(53) | 92(8)   | 81(6)   | 94(8)    | -21(6)  | -7(6)    | -29(6)         |
| C(54) | 56(6)   | 83(6)   | 83(7)    | -25(5)  | -5(5)    | -16(5)         |
| C(55) | 101(9)  | 86(7)   | 100(8)   | -25(6)  | -16(6)   | -44(6)         |
| Cl(3) | 115(3)  | 98(2)   | 130(3)   | -21(2)  | 0(2)     | -44(2)         |
| C(56) | 138(14) | 242(19) | 149(12)  | -58(12) | 1(12)    | -125(15)       |
| O(6)  | 177(15) | 238(18) | 1050(70) |         | -350(30) | -190(20) 7(13) |

---

Table 5. Hydrogen coordinates ( $\times 10^4$ ) and isotropic displacement parameters ( $\text{\AA}^2 \times 10^3$ ) for compound **2**.

|       | x    | y     | z     | U(eq) |
|-------|------|-------|-------|-------|
| H(1)  | 1568 | 4607  | -2307 | 87    |
| H(65) | 3730 | 2174  | 1863  | 85    |
| H(66) | 1105 | 723   | 1914  | 91    |
| H(67) | 2817 | 1719  | 375   | 96    |
| H(2)  | 1419 | 2646  | 2198  | 89    |
| H(3)  | 1500 | 2572  | -1677 | 90    |
| H(4)  | 567  | 1902  | -1652 | 90    |
| H(68) | 3185 | 262   | 2529  | 100   |
| H(5)  | 3348 | 5347  | -818  | 100   |
| H(6)  | 2438 | 4621  | -727  | 100   |
| H(7)  | 1723 | 1261  | -408  | 89    |
| H(8)  | 544  | 880   | -326  | 89    |
| H(9)  | 1426 | -1107 | 3735  | 95    |
| H(10) | 1249 | 50    | 3092  | 95    |
| H(11) | 5414 | 2482  | 2507  | 97    |
| H(12) | 5953 | 1869  | 3264  | 97    |
| H(13) | 1248 | 3723  | -4054 | 104   |
| H(14) | 673  | 2435  | 5167  | 138   |
| H(15) | -745 | 2895  | 5034  | 138   |
| H(16) | -42  | 3823  | 4899  | 138   |
| H(17) | -824 | 2150  | 4050  | 95    |
| H(18) | 4613 | -3209 | 3130  | 103   |
| H(19) | -981 | 3707  | -1988 | 98    |
| H(20) | -99  | 4406  | -1973 | 98    |
| H(21) | -692 | 2844  | -726  | 93    |
| H(22) | 388  | 3316  | -713  | 93    |
| H(23) | 2700 | 4641  | 3114  | 99    |
| H(24) | 3712 | 4535  | 2439  | 99    |
| H(25) | 3009 | 5223  | 443   | 126   |
| H(26) | 4446 | 4649  | 538   | 126   |
| H(27) | 3460 | 4399  | 1198  | 126   |
| H(28) | 4581 | 4357  | -1760 | 100   |
| H(29) | 3529 | 3809  | -1706 | 100   |

|       |       |       |       |     |
|-------|-------|-------|-------|-----|
| H(30) | 2096  | 5761  | -2050 | 112 |
| H(31) | 3159  | 6300  | -2114 | 112 |
| H(32) | 3751  | 5228  | -4131 | 96  |
| H(33) | 6831  | -632  | 3307  | 129 |
| H(34) | 7216  | 294   | 2632  | 129 |
| H(35) | 7232  | -939  | 2540  | 129 |
| H(36) | -1089 | 1223  | 790   | 131 |
| H(37) | -1254 | 2589  | 432   | 131 |
| H(38) | -980  | 2035  | 1251  | 131 |
| H(39) | 2910  | -3312 | 2736  | 135 |
| H(40) | 1453  | -2862 | 2938  | 135 |
| H(41) | 2354  | -3117 | 3520  | 135 |
| H(42) | 1193  | 4784  | 893   | 91  |
| H(43) | -430  | 3849  | 928   | 92  |
| H(44) | 7141  | 271   | 1266  | 94  |
| H(45) | -626  | 326   | 3973  | 108 |
| H(46) | -1756 | 87    | 3789  | 108 |
| H(47) | 1730  | 3676  | 3905  | 93  |
| H(48) | 2469  | -2437 | 1489  | 99  |
| H(49) | 6197  | 1788  | 177   | 104 |
| H(50) | 3771  | 4605  | -5122 | 150 |
| H(51) | 2371  | 5054  | -5287 | 150 |
| H(52) | 3113  | 3665  | -5054 | 150 |
| H(53) | 3833  | 2873  | 3782  | 103 |
| H(54) | 4714  | 3643  | 3444  | 103 |
| H(55) | 3866  | 1479  | 3011  | 97  |
| H(56) | 4774  | 684   | 3609  | 97  |
| H(57) | -289  | -503  | 2725  | 99  |
| H(58) | -224  | -1445 | 3484  | 99  |
| H(59) | 6286  | -2309 | 3050  | 102 |
| H(60) | 4956  | 3630  | -442  | 107 |
| H(61) | 4220  | 2816  | -484  | 107 |
| H(62) | 1786  | -873  | 359   | 90  |
| H(63) | -1837 | 1520  | 2691  | 109 |
| H(64) | -1947 | 2114  | 3330  | 109 |
| H(69) | 5707  | 1242  | -1031 | 237 |
| H(70) | 5275  | 475   | -1383 | 237 |
| H(71) | 6062  | -159  | -711  | 237 |
| H(72) | 3818  | 504   | -574  | 668 |





Table 6. Torsion angles [°] for compound **2**.

---

|                         |            |
|-------------------------|------------|
| C(55)-O(2)-C(2)-C(3)    | -178.0(8)  |
| C(55)-O(2)-C(2)-C(18)   | 3.5(12)    |
| O(2)-C(2)-C(3)-C(4)     | 178.4(7)   |
| C(18)-C(2)-C(3)-C(4)    | -3.1(13)   |
| C(25)-O(3)-C(4)-C(41)   | -0.7(12)   |
| C(25)-O(3)-C(4)-C(3)    | -179.0(7)  |
| C(2)-C(3)-C(4)-O(3)     | -179.9(7)  |
| C(2)-C(3)-C(4)-C(41)    | 1.8(13)    |
| C(39)-C(1)-C(6)-C(29)   | -1.3(14)   |
| C(39)-C(1)-C(6)-O(1)    | 178.2(8)   |
| C(28)-O(1)-C(6)-C(1)    | 0.5(13)    |
| C(28)-O(1)-C(6)-C(29)   | -180.0(8)  |
| C(45)-N(3)-C(8)-C(34)   | -0.3(11)   |
| C(45)-N(3)-C(8)-C(9)    | -176.4(8)  |
| C(34)-C(8)-C(9)-C(20)   | 128.5(12)  |
| N(3)-C(8)-C(9)-C(20)    | -56.6(12)  |
| C(34)-C(8)-C(9)-C(53)   | -109.1(12) |
| N(3)-C(8)-C(9)-C(53)    | 65.7(11)   |
| C(34)-C(8)-C(9)-C(26)   | 10.5(15)   |
| N(3)-C(8)-C(9)-C(26)    | -174.6(8)  |
| C(52)-N(2)-C(12)-C(54)  | -0.9(10)   |
| C(52)-N(2)-C(12)-C(23)  | 175.3(8)   |
| C(21)-C(10)-C(13)-C(49) | 178.9(8)   |
| C(52)-C(10)-C(13)-C(49) | 56.2(11)   |
| C(33)-C(10)-C(13)-C(49) | -62.5(11)  |
| O(2)-C(2)-C(18)-C(17)   | -179.2(8)  |
| C(3)-C(2)-C(18)-C(17)   | 2.4(13)    |
| C(41)-C(17)-C(18)-C(2)  | -0.3(13)   |
| C(16)-C(17)-C(18)-C(2)  | 179.9(8)   |
| C(31)-N(1)-C(20)-C(43)  | -0.1(10)   |
| C(31)-N(1)-C(20)-C(9)   | -178.6(8)  |
| C(8)-C(9)-C(20)-C(43)   | 134.3(11)  |
| C(53)-C(9)-C(20)-C(43)  | 11.6(14)   |
| C(26)-C(9)-C(20)-C(43)  | -106.9(12) |
| C(8)-C(9)-C(20)-N(1)    | -47.6(12)  |
| C(53)-C(9)-C(20)-N(1)   | -170.3(8)  |
| C(26)-C(9)-C(20)-N(1)   | 71.3(11)   |

|                         |            |
|-------------------------|------------|
| C(51)-C(19)-C(21)-N(4)  | -1.1(11)   |
| C(51)-C(19)-C(21)-C(10) | -179.9(10) |
| C(36)-N(4)-C(21)-C(19)  | 1.0(12)    |
| C(36)-N(4)-C(21)-C(10)  | 179.9(9)   |
| C(52)-C(10)-C(21)-C(19) | -114.8(12) |
| C(13)-C(10)-C(21)-C(19) | 122.3(12)  |
| C(33)-C(10)-C(21)-C(19) | 3.1(16)    |
| C(52)-C(10)-C(21)-N(4)  | 66.6(12)   |
| C(13)-C(10)-C(21)-N(4)  | -56.3(12)  |
| C(33)-C(10)-C(21)-N(4)  | -175.5(8)  |
| C(39)-O(4)-C(22)-C(5)   | -83.0(10)  |
| C(24)-C(5)-C(22)-O(4)   | 176.6(7)   |
| C(54)-C(12)-C(23)-C(45) | -135.8(10) |
| N(2)-C(12)-C(23)-C(45)  | 49.1(12)   |
| C(54)-C(12)-C(23)-C(32) | 103.6(12)  |
| N(2)-C(12)-C(23)-C(32)  | -71.5(11)  |
| C(54)-C(12)-C(23)-C(11) | -16.2(14)  |
| N(2)-C(12)-C(23)-C(11)  | 168.7(8)   |
| C(24)-C(11)-C(23)-C(12) | 179.4(8)   |
| C(24)-C(11)-C(23)-C(45) | -59.8(10)  |
| C(24)-C(11)-C(23)-C(32) | 59.6(10)   |
| C(22)-C(5)-C(24)-C(11)  | 171.3(8)   |
| C(23)-C(11)-C(24)-C(5)  | 171.6(8)   |
| C(4)-O(3)-C(25)-C(46)   | 79.1(10)   |
| C(53)-C(7)-C(27)-C(28)  | -171.9(8)  |
| C(6)-O(1)-C(28)-C(27)   | 86.3(10)   |
| C(7)-C(27)-C(28)-O(1)   | -179.2(8)  |
| C(1)-C(6)-C(29)-C(47)   | 0.6(14)    |
| O(1)-C(6)-C(29)-C(47)   | -178.9(8)  |
| C(20)-N(1)-C(31)-C(38)  | 1.6(10)    |
| C(20)-N(1)-C(31)-C(37)  | -179.5(8)  |
| N(3)-C(8)-C(34)-C(35)   | -0.1(10)   |
| C(9)-C(8)-C(34)-C(35)   | 175.4(9)   |
| C(8)-C(34)-C(35)-C(45)  | 0.5(10)    |
| C(21)-N(4)-C(36)-C(51)  | -0.4(12)   |
| C(21)-N(4)-C(36)-C(37)  | 179.6(9)   |
| N(4)-C(36)-C(37)-C(31)  | -64.2(13)  |
| C(51)-C(36)-C(37)-C(31) | 115.8(12)  |
| N(4)-C(36)-C(37)-C(48)  | 58.2(13)   |

|                         |            |
|-------------------------|------------|
| C(51)-C(36)-C(37)-C(48) | -121.8(12) |
| N(4)-C(36)-C(37)-C(30)  | 178.1(9)   |
| C(51)-C(36)-C(37)-C(30) | -1.9(15)   |
| C(38)-C(31)-C(37)-C(36) | -95.7(13)  |
| N(1)-C(31)-C(37)-C(36)  | 85.8(11)   |
| C(38)-C(31)-C(37)-C(48) | 141.8(10)  |
| N(1)-C(31)-C(37)-C(48)  | -36.7(12)  |
| C(38)-C(31)-C(37)-C(30) | 23.0(14)   |
| N(1)-C(31)-C(37)-C(30)  | -155.5(8)  |
| N(1)-C(31)-C(38)-C(43)  | -2.5(10)   |
| C(37)-C(31)-C(38)-C(43) | 178.9(10)  |
| C(47)-C(15)-C(39)-O(4)  | 178.6(8)   |
| C(47)-C(15)-C(39)-C(1)  | -0.4(15)   |
| C(22)-O(4)-C(39)-C(15)  | 177.6(8)   |
| C(22)-O(4)-C(39)-C(1)   | -3.4(12)   |
| C(6)-C(1)-C(39)-C(15)   | 1.2(14)    |
| C(6)-C(1)-C(39)-O(4)    | -177.8(8)  |
| C(18)-C(17)-C(41)-C(4)  | -1.0(14)   |
| C(16)-C(17)-C(41)-C(4)  | 178.8(8)   |
| O(3)-C(4)-C(41)-C(17)   | -177.9(8)  |
| C(3)-C(4)-C(41)-C(17)   | 0.3(14)    |
| N(1)-C(20)-C(43)-C(38)  | -1.4(11)   |
| C(9)-C(20)-C(43)-C(38)  | 176.9(9)   |
| C(31)-C(38)-C(43)-C(20) | 2.5(11)    |
| C(34)-C(35)-C(45)-N(3)  | -0.6(10)   |
| C(34)-C(35)-C(45)-C(23) | -177.4(10) |
| C(8)-N(3)-C(45)-C(35)   | 0.6(11)    |
| C(8)-N(3)-C(45)-C(23)   | 177.8(8)   |
| C(12)-C(23)-C(45)-C(35) | -128.3(11) |
| C(32)-C(23)-C(45)-C(35) | -7.3(14)   |
| C(11)-C(23)-C(45)-C(35) | 112.5(11)  |
| C(12)-C(23)-C(45)-N(3)  | 55.3(12)   |
| C(32)-C(23)-C(45)-N(3)  | 176.3(8)   |
| C(11)-C(23)-C(45)-N(3)  | -63.9(11)  |
| O(3)-C(25)-C(46)-C(14)  | 51.6(11)   |
| C(48)-C(14)-C(46)-C(25) | -82.3(11)  |
| C(6)-C(29)-C(47)-C(15)  | 0.1(14)    |
| C(6)-C(29)-C(47)-C(44)  | 178.4(9)   |
| C(39)-C(15)-C(47)-C(29) | -0.3(14)   |

|                         |            |
|-------------------------|------------|
| C(39)-C(15)-C(47)-C(44) | -178.4(9)  |
| C(46)-C(14)-C(48)-C(37) | 162.0(8)   |
| C(36)-C(37)-C(48)-C(14) | -178.7(9)  |
| C(31)-C(37)-C(48)-C(14) | -56.7(11)  |
| C(30)-C(37)-C(48)-C(14) | 61.2(11)   |
| C(55)-C(40)-C(49)-C(13) | 87.3(10)   |
| C(10)-C(13)-C(49)-C(40) | -166.6(8)  |
| N(4)-C(36)-C(51)-C(19)  | -0.3(11)   |
| C(37)-C(36)-C(51)-C(19) | 179.7(10)  |
| C(21)-C(19)-C(51)-C(36) | 0.9(12)    |
| C(54)-C(42)-C(52)-N(2)  | 1.8(11)    |
| C(54)-C(42)-C(52)-C(10) | -176.1(10) |
| C(12)-N(2)-C(52)-C(42)  | -0.6(11)   |
| C(12)-N(2)-C(52)-C(10)  | 177.5(9)   |
| C(21)-C(10)-C(52)-C(42) | 89.6(13)   |
| C(13)-C(10)-C(52)-C(42) | -147.4(11) |
| C(33)-C(10)-C(52)-C(42) | -28.1(16)  |
| C(21)-C(10)-C(52)-N(2)  | -88.0(11)  |
| C(13)-C(10)-C(52)-N(2)  | 34.9(12)   |
| C(33)-C(10)-C(52)-N(2)  | 154.2(9)   |
| C(27)-C(7)-C(53)-C(9)   | -168.5(7)  |
| C(8)-C(9)-C(53)-C(7)    | 57.1(11)   |
| C(20)-C(9)-C(53)-C(7)   | -179.0(8)  |
| C(26)-C(9)-C(53)-C(7)   | -62.0(11)  |
| N(2)-C(12)-C(54)-C(42)  | 2.0(10)    |
| C(23)-C(12)-C(54)-C(42) | -173.6(10) |
| C(52)-C(42)-C(54)-C(12) | -2.5(11)   |
| C(2)-O(2)-C(55)-C(40)   | -80.0(10)  |
| C(49)-C(40)-C(55)-O(2)  | -57.4(11)  |

---

Symmetry transformations used to generate equivalent atoms:
